# Supplementary material for: A quantum-inspired classifier for clonogenic assay evaluations
Source: PubMed Central journal article supplement (PMC7854718; doi:10.1038/s41598-021-82085-8), 2021-02-02
Supplement: 41598_2021_82085_MOESM1_ESM.pdf [file 41598_2021_82085_MOESM1_ESM.pdf]

# A quantum-inspired classifier for clonogenic assay evaluations - Supplementary material

Giuseppe Sergioli<sup>1,\*</sup>, Carmelo Militello<sup>2</sup>, Leonardo Rundo<sup>3,4</sup>, Luigi Minafra<sup>2</sup>, Filippo Torrisi<sup>5</sup>, Giorgio Russo<sup>2</sup>, Keng Loon Chow<sup>1</sup>, and Roberto Giuntini<sup>1,6</sup>

<sup>1</sup>University of Cagliari, Cagliari, Italy.

<sup>2</sup>Institute of Molecular Bioimaging and Physiology, Italian National Research Council, Cefalú, Palermo, Italy.

<sup>3</sup>Department of Radiology, University of Cambridge, Cambridge, United Kingdom.

<sup>4</sup>Cancer Research UK Cambridge Centre, University of Cambridge, Cambridge, United Kingdom.

<sup>5</sup>Department of Biomedical and Biotechnological Sciences, University of Catania, Catania, Italy.

<sup>6</sup>Centro Linceo Interdisciplinare "Beniamino Segre", Accademia dei Lincei, Rome, Italy.

\*Corresponding author: giuseppe.sergioli@gmail.com

## ABSTRACT

This file contains all the supplementary material regarding the experimental trials described and carried out in the manuscript "A quantum-inspired classifier for clonogenic assay evaluations". In the first section, detailed descriptions of the extracted texture features are provided. In the second section, we show the experimental results obtained for each of the four cell lines MDA-MD-231, U87-MG, MCF7, and U251, by considering the best performing image feature. The third section is devoted to show the performance of the Helstrom Quantum Classifier (HQC) on a new unseen test set. Finally, in the last section we summarize the full results of the whole experiment, for all the investigated cell lines and image features.

## S1. The extracted Haralick's features

We start from the assumption that biomedical images contain information phenotype of the underlying physiopathology, which is not always easily identifiable by simple 'visual' inspection. These information can be revealed through quantitative analysis, by extracting the so called 'descriptors' in order to make it possible to acquire further knowledge on the dominion. The Gray-Level Co-occurrence Matrix (GLCM) computation is the first step to obtain the features.

Formally, let a GLCM with size  $L \times L$ , where  $L$  represents the maximum number of gray-levels according to a given quantization scheme, denote the second-order joint probability function  $p(i, j)$  of an image region (where  $i, j \in [0, 1, \dots, L-1]$  represent a gray-level pair) after the normalization by the total number of pixels. These descriptors are generally called Haralick's features<sup>1,2</sup>.

Given a squared window of size  $\omega \times \omega$  pixels sliding over the whole image<sup>3</sup>, we computed the following GLCM-based features (with  $i, j \in [0, 1, \dots, L-1]$ ):

- contrast  $\in [0, (L-1) \times (L-1)]$  yields a measure of the intensity contrast between neighboring pixels:

$$\text{contrast}(i, j) = \sum_{i=0}^{L-1} \sum_{j=0}^{L-1} |i-j|^2 \cdot p(i, j), \quad (1)$$

contrast = 0 for a constant image;

- correlation  $\in [-1, 1]$  indicates the degree of correlation between a pixel and its neighbor:

$$\text{correlation}(i, j) = \frac{\sum_{i=0}^{L-1} \sum_{j=0}^{L-1} (i - \mu_x)(j - \mu_y) \cdot p(i, j)}{\sigma_x \sigma_y}, \quad (2)$$

where:  $\mu_x = \sum_i \sum_j i \cdot p(i, j)$ ,  $\mu_y = \sum_i \sum_j j \cdot p(i, j)$ ,  $\sigma_x = \sum_i \sum_j (i - \mu_x) \cdot p(i, j)$ , and  $\sigma_y = \sum_i \sum_j (j - \mu_y) \cdot p(i, j)$  (with  $\sum_i$  and  $\sum_j$  denoting  $\sum_{i=0}^{L-1}$  and  $\sum_{j=0}^{L-1}$ , respectively). This feature is 1 or  $-1$  for a perfectly positively or negatively correlated image, respectively;

- energy  $\in [0, 1]$  calculates the sum of squared elements in the GLCM:

$$\text{energy}(i, j) = \sum_{i=0}^{L-1} \sum_{j=0}^{L-1} p(i, j)^2, \quad (3)$$

energy = 1 for a constant image;

- homogeneity  $\in [0, 1]$  Returns a value that measures the closeness of the distribution of elements in the GLCM to the GLCM diagonal:

$$\text{homogeneity}(i, j) = \frac{\sum_{i=0}^{L-1} \sum_{j=0}^{L-1} p(i, j)}{(1 + |i - j|)}, \quad (4)$$

homogeneity = 1 for a diagonal GLCM.

## S2. Experimental results

This section is divided into four groups, one for each cell line MDA-MD-231, U87-MG, MCF7 and U251, respectively. Each group contains two reports, the first shows: (1) the balanced accuracy score over 30 datasets (for the best performing image feature) for the HQC and the 18 competing classifiers, obtained by hypertuning the hyperparameters of each classifier in order to optimize the balanced accuracy score; (2) heatmaps of a classifier outperforming (“wins”) over another classifier (“losses”) out of the 30 datasets (for the best performing image feature); and (3) a table showing the averaged balanced accuracy score over the 30 datasets for each of the six image features, *RGB*,  $L^*u^*v^*$ , *contrast*, *correlation*, *energy* and *homogeneity*. The second report is the analogous of the first, where the role of the balanced accuracy is replaced by the AUROC score. All performance evaluation is performed using the test set. The aim of the experimental procedure is to find the most informative image feature in discriminating a pixel between a colony or a background, i.e., the image feature which maximizes the value of the balanced accuracy and the AUROC scores, respectively.

### S2.1. Cell line MDA-MD-231

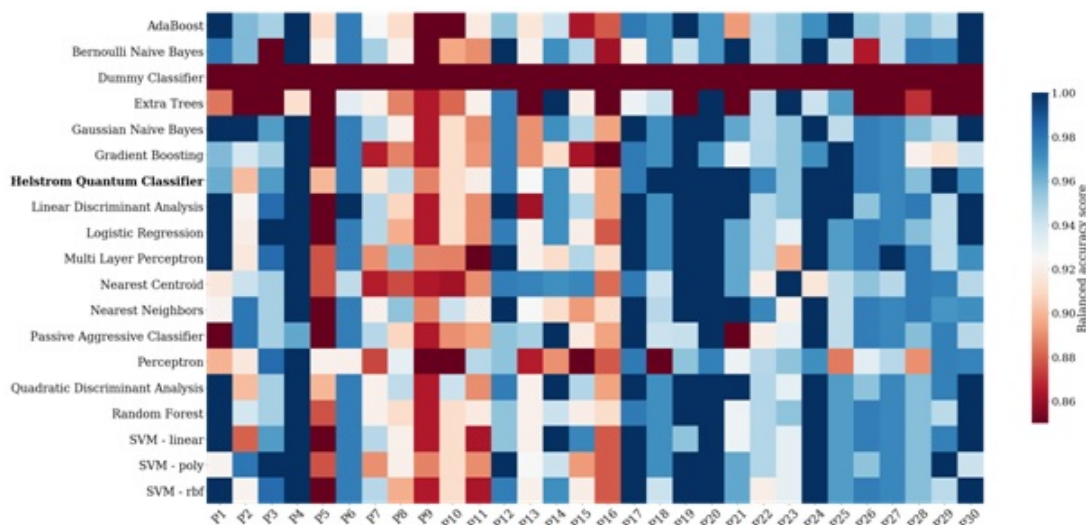

**Fig. 2.1.1 | Balance accuracy score of 19 classifiers across 30 homogeneity image feature datasets for cell line MDA-MD-231.**

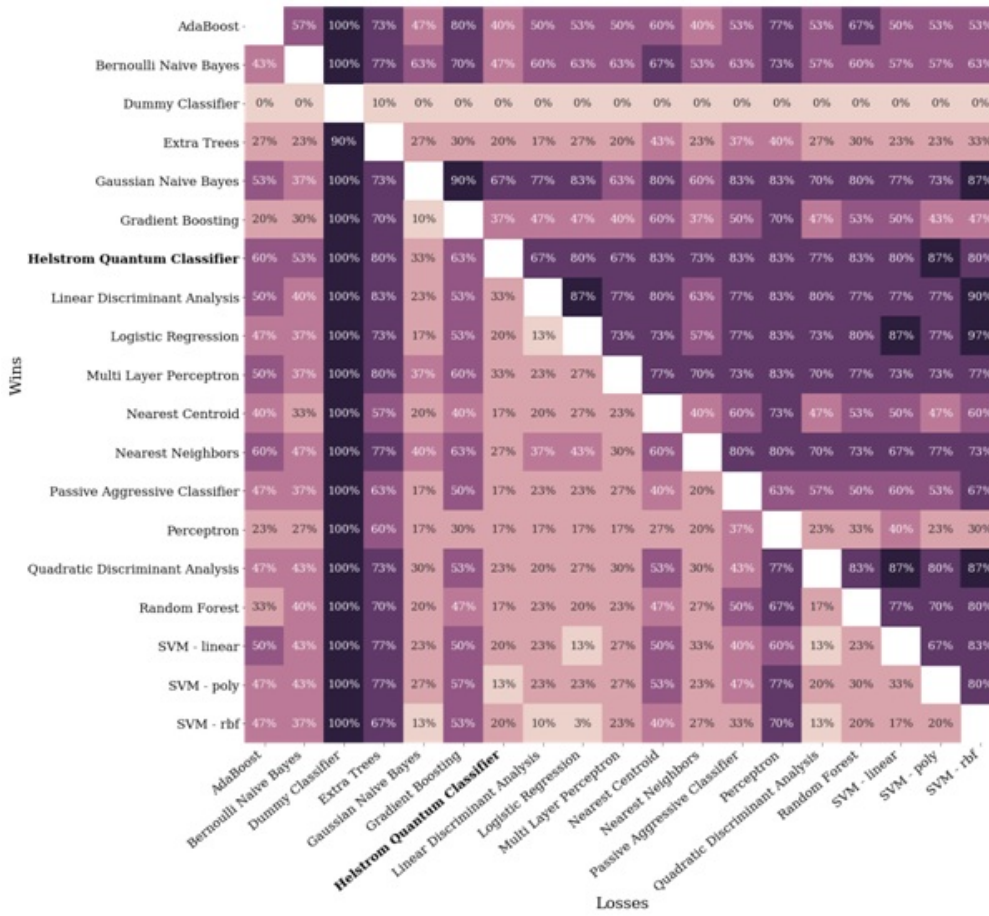

**Fig. 2.1.2 | Percentage of datasets where model A (“Wins”) outperformed model B (“Losses”) out of 30 homogeneity image feature datasets for cell line MDA-MD-231 (balanced accuracy score).**

| Classifiers                        | Image features |               |               |               |               |                      |
|------------------------------------|----------------|---------------|---------------|---------------|---------------|----------------------|
|                                    | RGB            | L*u*v*        | Contrast      | Correlation   | Energy        | Homogeneity          |
| AdaBoost                           | 0.861 ± 0.088  | 0.878 ± 0.065 | 0.898 ± 0.065 | 0.738 ± 0.110 | 0.936 ± 0.052 | 0.942 ± 0.046        |
| Bernoulli Naive Bayes              | 0.841 ± 0.060  | 0.855 ± 0.079 | 0.840 ± 0.097 | 0.630 ± 0.126 | 0.854 ± 0.087 | 0.940 ± 0.057        |
| Dummy Classifier                   | 0.507 ± 0.047  | 0.513 ± 0.056 | 0.506 ± 0.069 | 0.518 ± 0.042 | 0.497 ± 0.069 | 0.485 ± 0.060        |
| Extra Trees                        | 0.822 ± 0.120  | 0.839 ± 0.141 | 0.709 ± 0.163 | 0.616 ± 0.121 | 0.767 ± 0.169 | 0.851 ± 0.139        |
| Gaussian Naive Bayes               | 0.855 ± 0.063  | 0.874 ± 0.084 | 0.886 ± 0.063 | 0.711 ± 0.102 | 0.923 ± 0.067 | 0.954 ± 0.045        |
| Gradient Boosting                  | 0.876 ± 0.076  | 0.874 ± 0.069 | 0.899 ± 0.063 | 0.835 ± 0.113 | 0.941 ± 0.047 | 0.933 ± 0.050        |
| <b>Helstrom Quantum Classifier</b> | 0.895 ± 0.058  | 0.883 ± 0.069 | 0.902 ± 0.070 | 0.775 ± 0.081 | 0.938 ± 0.047 | <b>0.959 ± 0.036</b> |
| Linear Discriminant Analysis       | 0.850 ± 0.066  | 0.865 ± 0.080 | 0.837 ± 0.075 | 0.660 ± 0.122 | 0.860 ± 0.089 | 0.955 ± 0.049        |
| Logistic Regression                | 0.882 ± 0.061  | 0.879 ± 0.086 | 0.883 ± 0.066 | 0.657 ± 0.131 | 0.932 ± 0.056 | 0.951 ± 0.045        |
| Multi Layer Perceptron             | 0.890 ± 0.055  | 0.885 ± 0.069 | 0.901 ± 0.069 | 0.833 ± 0.086 | 0.942 ± 0.052 | 0.940 ± 0.091        |
| Nearest Centroid                   | 0.839 ± 0.058  | 0.868 ± 0.078 | 0.846 ± 0.070 | 0.686 ± 0.114 | 0.867 ± 0.063 | 0.941 ± 0.044        |
| Nearest Neighbors                  | 0.890 ± 0.069  | 0.875 ± 0.064 | 0.903 ± 0.073 | 0.808 ± 0.070 | 0.942 ± 0.049 | 0.953 ± 0.040        |
| Passive Aggressive Classifier      | 0.831 ± 0.105  | 0.809 ± 0.113 | 0.828 ± 0.118 | 0.607 ± 0.137 | 0.907 ± 0.062 | 0.935 ± 0.052        |
| Perceptron                         | 0.790 ± 0.117  | 0.832 ± 0.106 | 0.831 ± 0.112 | 0.631 ± 0.103 | 0.914 ± 0.054 | 0.916 ± 0.060        |
| Quadratic Discriminant Analysis    | 0.872 ± 0.065  | 0.876 ± 0.074 | 0.876 ± 0.076 | 0.731 ± 0.112 | 0.925 ± 0.066 | 0.957 ± 0.039        |
| Random Forest                      | 0.874 ± 0.078  | 0.883 ± 0.074 | 0.919 ± 0.058 | 0.827 ± 0.119 | 0.944 ± 0.043 | 0.951 ± 0.036        |
| SVM - linear                       | 0.880 ± 0.063  | 0.873 ± 0.078 | 0.880 ± 0.071 | 0.655 ± 0.141 | 0.929 ± 0.052 | 0.949 ± 0.046        |
| SVM - poly                         | 0.883 ± 0.055  | 0.892 ± 0.069 | 0.899 ± 0.065 | 0.811 ± 0.084 | 0.926 ± 0.050 | 0.950 ± 0.042        |
| SVM - rbf                          | 0.876 ± 0.062  | 0.874 ± 0.084 | 0.890 ± 0.069 | 0.662 ± 0.134 | 0.931 ± 0.052 | 0.948 ± 0.046        |

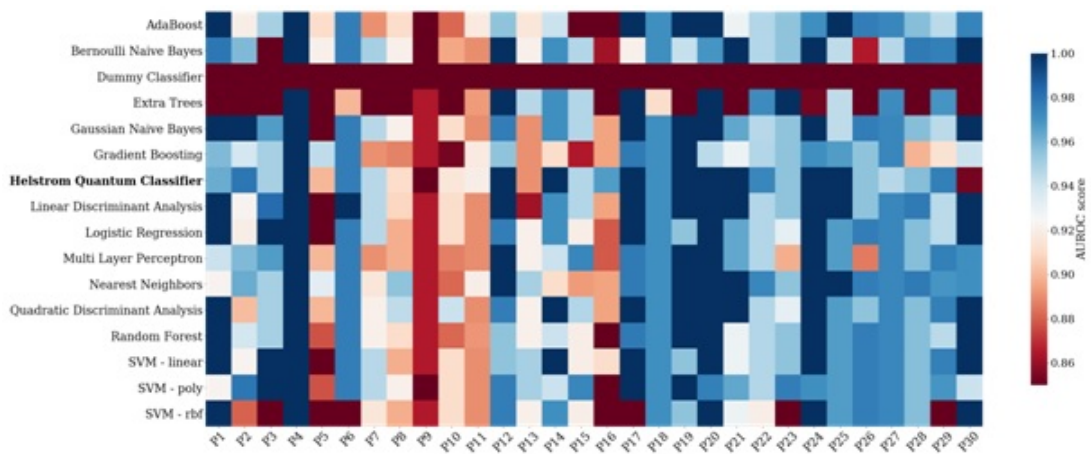

Fig. 2.1.3 | AUROC score of 19 classifiers across 30 homogeneity image feature datasets for cell line MDA-MD-231.

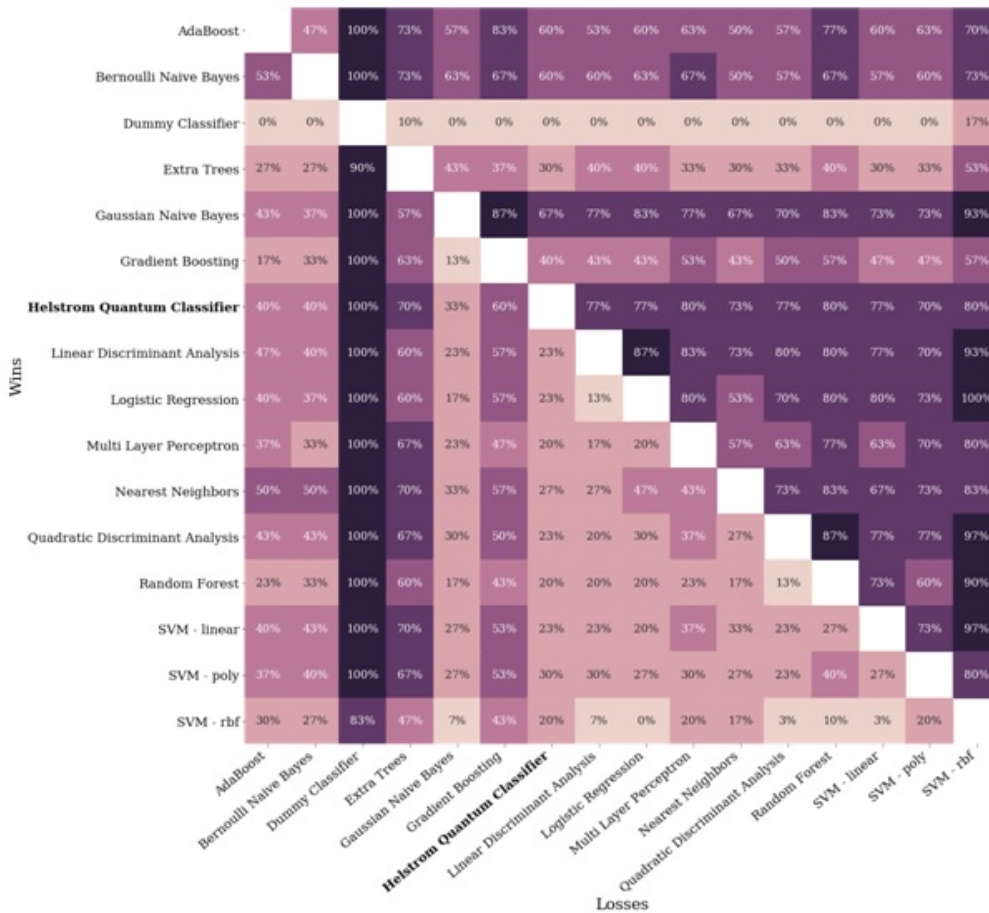

Fig. 2.1.4 | Percentage of datasets where model A (“Wins”) outperformed model B (“Losses”) out of 30 homogeneity image feature datasets for cell line MDA-MD-231 (AUROC score).

| Classifiers                        | Image features |               |               |               |               |                      |
|------------------------------------|----------------|---------------|---------------|---------------|---------------|----------------------|
|                                    | RGB            | L*u*v*        | Contrast      | Correlation   | Energy        | Homogeneity          |
| AdaBoost                           | 0.874 ± 0.076  | 0.881 ± 0.067 | 0.898 ± 0.063 | 0.739 ± 0.130 | 0.932 ± 0.051 | 0.943 ± 0.048        |
| Bernoulli Naive Bayes              | 0.841 ± 0.060  | 0.855 ± 0.079 | 0.840 ± 0.097 | 0.630 ± 0.126 | 0.854 ± 0.087 | 0.940 ± 0.057        |
| Dummy Classifier                   | 0.505 ± 0.027  | 0.498 ± 0.072 | 0.484 ± 0.046 | 0.497 ± 0.070 | 0.503 ± 0.077 | 0.497 ± 0.049        |
| Extra Trees                        | 0.813 ± 0.132  | 0.812 ± 0.159 | 0.678 ± 0.162 | 0.615 ± 0.127 | 0.740 ± 0.178 | 0.837 ± 0.159        |
| Gaussian Naive Bayes               | 0.855 ± 0.063  | 0.874 ± 0.084 | 0.886 ± 0.063 | 0.711 ± 0.102 | 0.923 ± 0.067 | 0.954 ± 0.045        |
| Gradient Boosting                  | 0.880 ± 0.074  | 0.868 ± 0.076 | 0.902 ± 0.066 | 0.834 ± 0.114 | 0.930 ± 0.056 | 0.935 ± 0.039        |
| <b>Helstrom Quantum Classifier</b> | 0.879 ± 0.081  | 0.884 ± 0.066 | 0.905 ± 0.062 | 0.787 ± 0.082 | 0.927 ± 0.058 | <b>0.954 ± 0.050</b> |
| Linear Discriminant Analysis       | 0.850 ± 0.066  | 0.865 ± 0.080 | 0.837 ± 0.075 | 0.660 ± 0.122 | 0.860 ± 0.089 | 0.955 ± 0.049        |
| Logistic Regression                | 0.872 ± 0.072  | 0.874 ± 0.088 | 0.886 ± 0.068 | 0.660 ± 0.138 | 0.927 ± 0.051 | 0.950 ± 0.044        |
| Multi Layer Perceptron             | 0.889 ± 0.056  | 0.889 ± 0.057 | 0.894 ± 0.065 | 0.804 ± 0.104 | 0.932 ± 0.041 | 0.946 ± 0.042        |
| Nearest Neighbors                  | 0.883 ± 0.070  | 0.877 ± 0.066 | 0.902 ± 0.064 | 0.800 ± 0.075 | 0.937 ± 0.049 | 0.956 ± 0.039        |
| Quadratic Discriminant Analysis    | 0.872 ± 0.065  | 0.876 ± 0.074 | 0.876 ± 0.076 | 0.731 ± 0.112 | 0.925 ± 0.066 | 0.957 ± 0.039        |
| Random Forest                      | 0.881 ± 0.068  | 0.878 ± 0.077 | 0.912 ± 0.062 | 0.817 ± 0.117 | 0.943 ± 0.040 | 0.946 ± 0.043        |
| SVM - linear                       | 0.879 ± 0.064  | 0.876 ± 0.076 | 0.881 ± 0.073 | 0.648 ± 0.135 | 0.914 ± 0.049 | 0.953 ± 0.043        |
| SVM - poly                         | 0.880 ± 0.058  | 0.864 ± 0.082 | 0.897 ± 0.064 | 0.805 ± 0.087 | 0.920 ± 0.052 | 0.950 ± 0.047        |
| SVM - rbf                          | 0.845 ± 0.115  | 0.860 ± 0.104 | 0.831 ± 0.147 | 0.652 ± 0.132 | 0.879 ± 0.138 | 0.843 ± 0.193        |

Results exclude Nearest Centroid, Passive Aggressive Classifier and Perceptron.

## S2.2. Cell line U87-MG

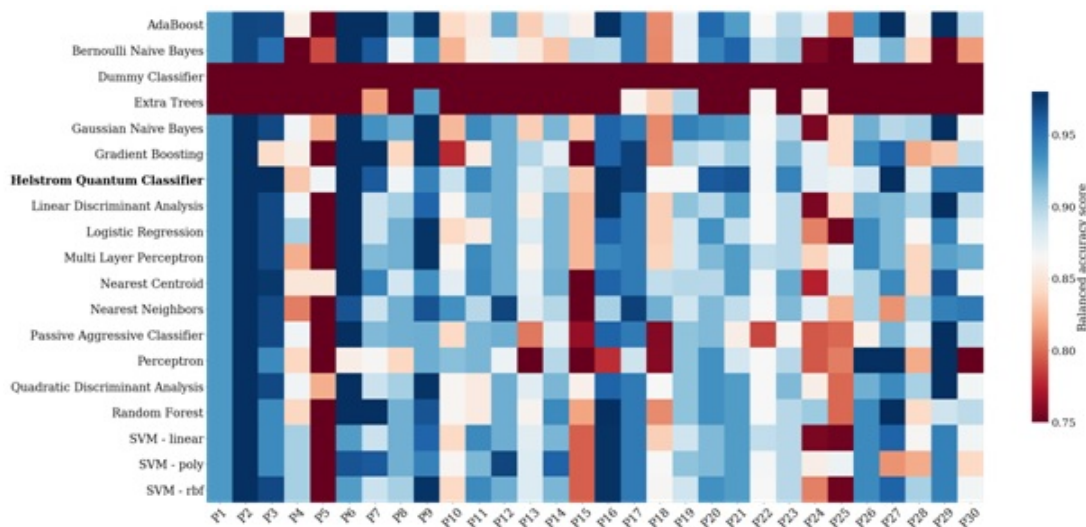

Fig. 2.2.1 | Balance accuracy score of 19 classifiers across 30 homogeneity image feature datasets for cell line U87-MG.



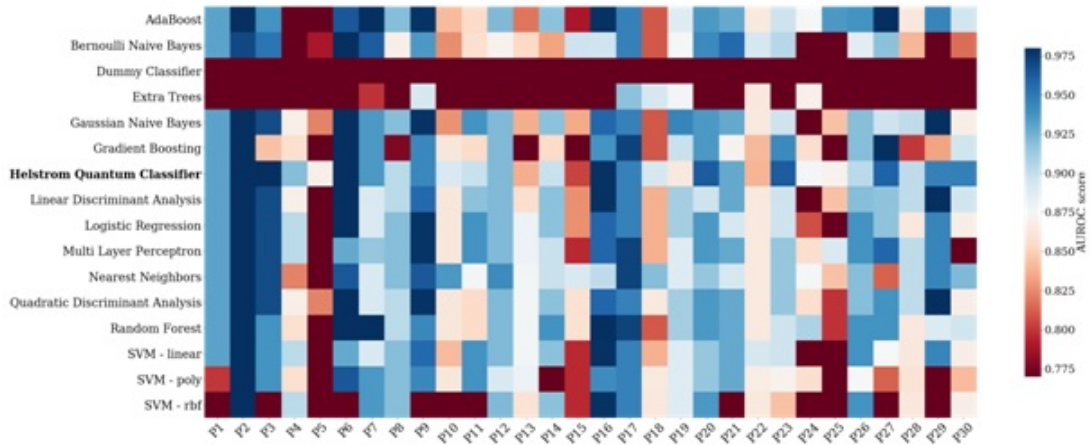

Fig. 2.2.3 | AUROC score of 19 classifiers across 30 homogeneity image feature datasets for cell line U87-MG.

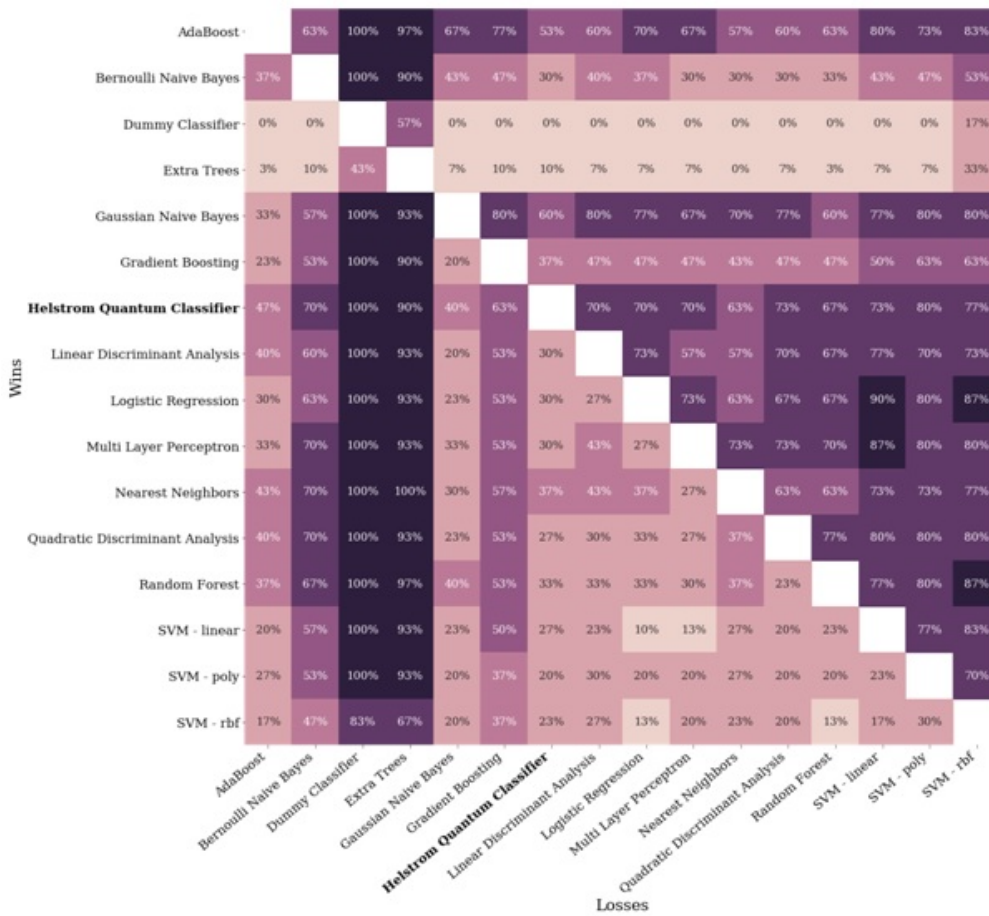

Fig. 2.2.4 | Percentage of datasets where model A (“Wins”) outperformed model B (“Losses”) out of 30 homogeneity image feature datasets for cell line U87-MG (AUROC score).

| Classifiers                        | Image features |               |               |               |               |                      |
|------------------------------------|----------------|---------------|---------------|---------------|---------------|----------------------|
|                                    | RGB            | L*u*v*        | Contrast      | Correlation   | Energy        | Homogeneity          |
| AdaBoost                           | 0.776 ± 0.117  | 0.779 ± 0.110 | 0.864 ± 0.060 | 0.704 ± 0.105 | 0.873 ± 0.082 | 0.898 ± 0.077        |
| Bernoulli Naive Bayes              | 0.765 ± 0.095  | 0.788 ± 0.084 | 0.841 ± 0.070 | 0.629 ± 0.088 | 0.771 ± 0.126 | 0.869 ± 0.082        |
| Dummy Classifier                   | 0.504 ± 0.050  | 0.504 ± 0.056 | 0.512 ± 0.055 | 0.480 ± 0.076 | 0.505 ± 0.055 | 0.516 ± 0.058        |
| Extra Trees                        | 0.577 ± 0.098  | 0.583 ± 0.120 | 0.529 ± 0.078 | 0.515 ± 0.043 | 0.525 ± 0.068 | 0.613 ± 0.156        |
| Gaussian Naive Bayes               | 0.734 ± 0.089  | 0.752 ± 0.096 | 0.780 ± 0.086 | 0.674 ± 0.074 | 0.890 ± 0.065 | 0.905 ± 0.059        |
| Gradient Boosting                  | 0.815 ± 0.091  | 0.827 ± 0.085 | 0.877 ± 0.064 | 0.758 ± 0.095 | 0.879 ± 0.075 | 0.871 ± 0.085        |
| <b>Helstrom Quantum Classifier</b> | 0.791 ± 0.099  | 0.792 ± 0.090 | 0.838 ± 0.066 | 0.768 ± 0.075 | 0.902 ± 0.057 | <b>0.917 ± 0.048</b> |
| Linear Discriminant Analysis       | 0.752 ± 0.095  | 0.736 ± 0.085 | 0.740 ± 0.076 | 0.639 ± 0.086 | 0.842 ± 0.107 | 0.900 ± 0.065        |
| Logistic Regression                | 0.770 ± 0.100  | 0.764 ± 0.102 | 0.805 ± 0.085 | 0.636 ± 0.086 | 0.877 ± 0.071 | 0.897 ± 0.070        |
| Multi Layer Perceptron             | 0.792 ± 0.109  | 0.784 ± 0.115 | 0.840 ± 0.067 | 0.768 ± 0.079 | 0.877 ± 0.099 | 0.901 ± 0.070        |
| Nearest Neighbors                  | 0.793 ± 0.105  | 0.793 ± 0.090 | 0.847 ± 0.044 | 0.739 ± 0.086 | 0.884 ± 0.076 | 0.902 ± 0.054        |
| Quadratic Discriminant Analysis    | 0.773 ± 0.100  | 0.750 ± 0.102 | 0.782 ± 0.100 | 0.667 ± 0.074 | 0.879 ± 0.081 | 0.908 ± 0.050        |
| Random Forest                      | 0.808 ± 0.106  | 0.803 ± 0.100 | 0.861 ± 0.059 | 0.763 ± 0.083 | 0.900 ± 0.070 | 0.902 ± 0.068        |
| SVM - linear                       | 0.764 ± 0.100  | 0.751 ± 0.113 | 0.798 ± 0.088 | 0.591 ± 0.103 | 0.891 ± 0.065 | 0.888 ± 0.076        |
| SVM - poly                         | 0.745 ± 0.119  | 0.746 ± 0.111 | 0.780 ± 0.084 | 0.720 ± 0.091 | 0.865 ± 0.095 | 0.864 ± 0.090        |
| SVM - rbf                          | 0.756 ± 0.123  | 0.741 ± 0.114 | 0.682 ± 0.157 | 0.575 ± 0.096 | 0.859 ± 0.130 | 0.770 ± 0.179        |

Results exclude Nearest Centroid, Passive Aggressive Classifier and Perceptron.

### S2.3. Cell line MCF7

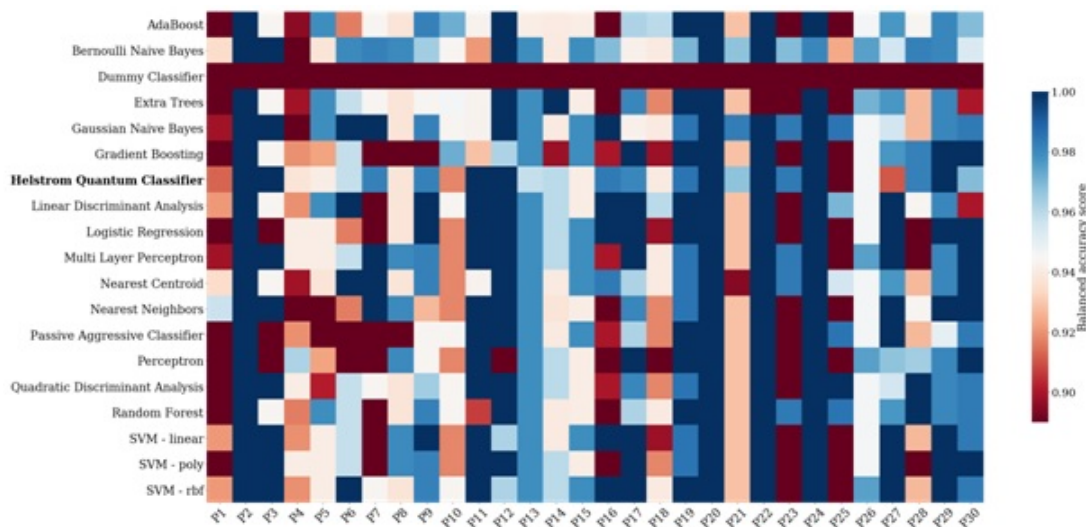

Fig. 2.3.1 | Balance accuracy score of 19 classifiers across 30 L\*u\*v\* image feature datasets for cell line MCF7.



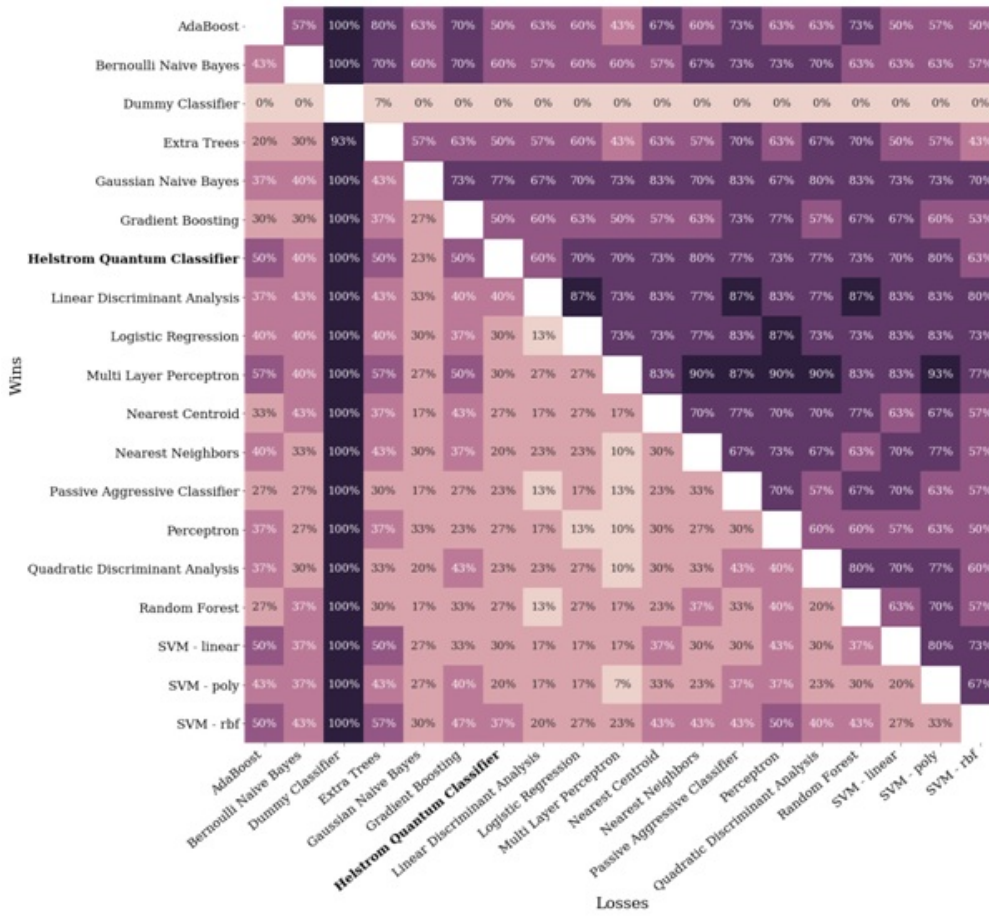

Fig. 2.3.2 | Percentage of datasets where model A (“Wins”) outperformed model B (“Losses”) out of 30 L\*u\*v\* image feature datasets for cell line MCF7 (balanced accuracy score).

| Classifiers                        | Image features |                      |               |               |               |               |
|------------------------------------|----------------|----------------------|---------------|---------------|---------------|---------------|
|                                    | RGB            | L*u*v*               | Contrast      | Correlation   | Energy        | Homogeneity   |
| AdaBoost                           | 0.959 ± 0.046  | 0.940 ± 0.070        | 0.827 ± 0.106 | 0.699 ± 0.099 | 0.851 ± 0.111 | 0.875 ± 0.092 |
| Bernoulli Naive Bayes              | 0.951 ± 0.048  | 0.964 ± 0.030        | 0.717 ± 0.124 | 0.661 ± 0.107 | 0.718 ± 0.133 | 0.837 ± 0.118 |
| Dummy Classifier                   | 0.505 ± 0.064  | 0.509 ± 0.041        | 0.494 ± 0.048 | 0.484 ± 0.044 | 0.500 ± 0.057 | 0.491 ± 0.044 |
| Extra Trees                        | 0.858 ± 0.150  | 0.914 ± 0.125        | 0.507 ± 0.037 | 0.526 ± 0.061 | 0.523 ± 0.078 | 0.585 ± 0.124 |
| Gaussian Naive Bayes               | 0.943 ± 0.043  | 0.969 ± 0.034        | 0.641 ± 0.095 | 0.715 ± 0.091 | 0.886 ± 0.069 | 0.882 ± 0.078 |
| Gradient Boosting                  | 0.934 ± 0.080  | 0.939 ± 0.062        | 0.814 ± 0.103 | 0.706 ± 0.088 | 0.844 ± 0.093 | 0.866 ± 0.110 |
| <b>Helstrom Quantum Classifier</b> | 0.949 ± 0.052  | <b>0.965 ± 0.033</b> | 0.798 ± 0.109 | 0.775 ± 0.081 | 0.875 ± 0.059 | 0.892 ± 0.065 |
| Linear Discriminant Analysis       | 0.947 ± 0.047  | 0.961 ± 0.047        | 0.626 ± 0.097 | 0.685 ± 0.098 | 0.781 ± 0.139 | 0.874 ± 0.095 |
| Logistic Regression                | 0.946 ± 0.055  | 0.948 ± 0.060        | 0.638 ± 0.107 | 0.674 ± 0.095 | 0.866 ± 0.097 | 0.856 ± 0.096 |
| Multi Layer Perceptron             | 0.946 ± 0.052  | 0.965 ± 0.042        | 0.760 ± 0.106 | 0.718 ± 0.089 | 0.867 ± 0.089 | 0.856 ± 0.111 |
| Nearest Centroid                   | 0.923 ± 0.056  | 0.964 ± 0.032        | 0.770 ± 0.117 | 0.739 ± 0.095 | 0.851 ± 0.068 | 0.890 ± 0.063 |
| Nearest Neighbors                  | 0.951 ± 0.056  | 0.947 ± 0.063        | 0.769 ± 0.109 | 0.759 ± 0.075 | 0.861 ± 0.075 | 0.854 ± 0.101 |
| Passive Aggressive Classifier      | 0.945 ± 0.048  | 0.943 ± 0.051        | 0.690 ± 0.120 | 0.616 ± 0.145 | 0.787 ± 0.145 | 0.770 ± 0.154 |
| Perceptron                         | 0.938 ± 0.056  | 0.923 ± 0.094        | 0.652 ± 0.167 | 0.630 ± 0.145 | 0.774 ± 0.122 | 0.795 ± 0.149 |
| Quadratic Discriminant Analysis    | 0.959 ± 0.050  | 0.961 ± 0.036        | 0.638 ± 0.096 | 0.710 ± 0.111 | 0.883 ± 0.072 | 0.872 ± 0.089 |
| Random Forest                      | 0.948 ± 0.064  | 0.956 ± 0.044        | 0.816 ± 0.112 | 0.740 ± 0.097 | 0.851 ± 0.113 | 0.860 ± 0.110 |
| SVM - linear                       | 0.955 ± 0.050  | 0.956 ± 0.052        | 0.654 ± 0.138 | 0.696 ± 0.107 | 0.868 ± 0.110 | 0.873 ± 0.108 |
| SVM - poly                         | 0.940 ± 0.054  | 0.949 ± 0.060        | 0.762 ± 0.108 | 0.730 ± 0.080 | 0.862 ± 0.078 | 0.874 ± 0.105 |
| SVM - rbf                          | 0.950 ± 0.053  | 0.962 ± 0.048        | 0.681 ± 0.134 | 0.697 ± 0.108 | 0.868 ± 0.112 | 0.877 ± 0.102 |

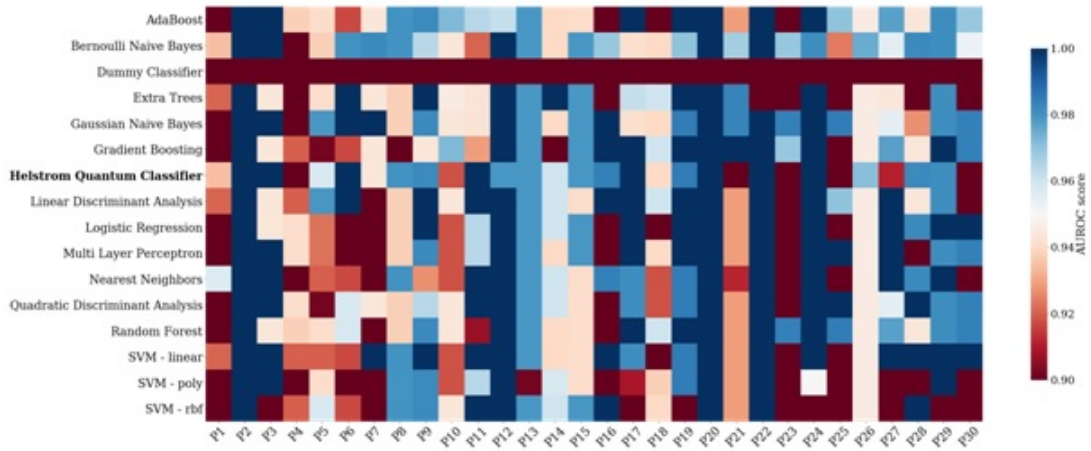

Fig. 2.3.3 | AUROC score of 19 classifiers across 30 L\*u\*v\* image feature datasets for cell line MCF7.

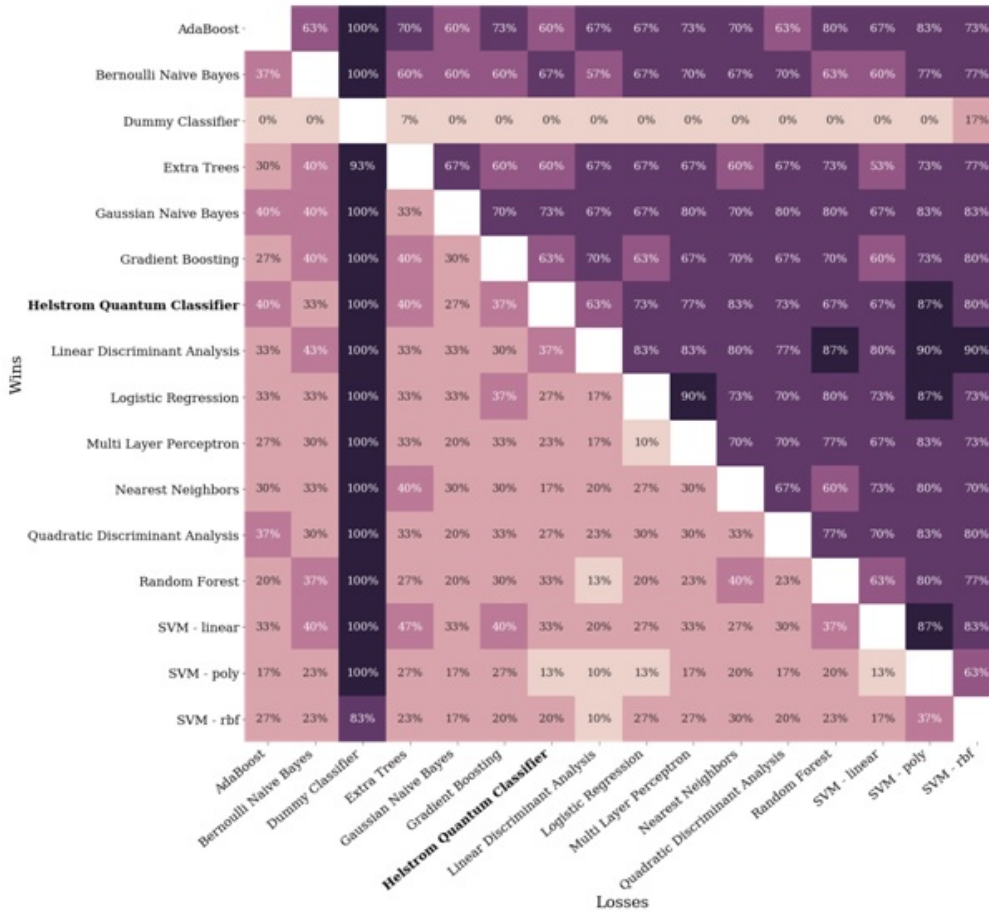

Fig. 2.3.4 | Percentage of datasets where model A (“Wins”) outperformed model B (“Losses”) out of 30 L\*u\*v\* image feature datasets for cell line MCF7 (AUROC score).

| Classifiers                        | Image features |                      |               |               |               |               |
|------------------------------------|----------------|----------------------|---------------|---------------|---------------|---------------|
|                                    | RGB            | L*u*v*               | Contrast      | Correlation   | Energy        | Homogeneity   |
| AdaBoost                           | 0.944 ± 0.076  | 0.951 ± 0.058        | 0.821 ± 0.110 | 0.704 ± 0.107 | 0.845 ± 0.103 | 0.857 ± 0.102 |
| Bernoulli Naive Bayes              | 0.951 ± 0.048  | 0.964 ± 0.030        | 0.717 ± 0.124 | 0.661 ± 0.107 | 0.718 ± 0.133 | 0.837 ± 0.118 |
| Dummy Classifier                   | 0.475 ± 0.066  | 0.506 ± 0.073        | 0.504 ± 0.041 | 0.506 ± 0.051 | 0.496 ± 0.069 | 0.493 ± 0.051 |
| Extra Trees                        | 0.856 ± 0.148  | 0.918 ± 0.129        | 0.505 ± 0.025 | 0.511 ± 0.038 | 0.509 ± 0.043 | 0.527 ± 0.068 |
| Gaussian Naive Bayes               | 0.943 ± 0.043  | 0.969 ± 0.034        | 0.641 ± 0.095 | 0.715 ± 0.091 | 0.886 ± 0.069 | 0.882 ± 0.078 |
| Gradient Boosting                  | 0.911 ± 0.112  | 0.952 ± 0.060        | 0.773 ± 0.121 | 0.719 ± 0.091 | 0.820 ± 0.092 | 0.837 ± 0.117 |
| <b>Helstrom Quantum Classifier</b> | 0.955 ± 0.045  | <b>0.960 ± 0.041</b> | 0.753 ± 0.120 | 0.766 ± 0.090 | 0.866 ± 0.078 | 0.883 ± 0.071 |
| Linear Discriminant Analysis       | 0.947 ± 0.047  | 0.961 ± 0.047        | 0.626 ± 0.096 | 0.685 ± 0.098 | 0.780 ± 0.141 | 0.874 ± 0.095 |
| Logistic Regression                | 0.943 ± 0.062  | 0.950 ± 0.054        | 0.637 ± 0.108 | 0.672 ± 0.095 | 0.853 ± 0.115 | 0.848 ± 0.107 |
| Multi Layer Perceptron             | 0.953 ± 0.056  | 0.950 ± 0.054        | 0.770 ± 0.120 | 0.700 ± 0.103 | 0.850 ± 0.082 | 0.869 ± 0.104 |
| Nearest Neighbors                  | 0.948 ± 0.045  | 0.947 ± 0.061        | 0.767 ± 0.115 | 0.751 ± 0.087 | 0.862 ± 0.080 | 0.850 ± 0.110 |
| Quadratic Discriminant Analysis    | 0.959 ± 0.050  | 0.961 ± 0.036        | 0.638 ± 0.096 | 0.710 ± 0.111 | 0.883 ± 0.072 | 0.872 ± 0.089 |
| Random Forest                      | 0.949 ± 0.066  | 0.953 ± 0.057        | 0.811 ± 0.116 | 0.733 ± 0.100 | 0.838 ± 0.133 | 0.852 ± 0.104 |
| SVM - linear                       | 0.946 ± 0.054  | 0.960 ± 0.052        | 0.635 ± 0.135 | 0.687 ± 0.113 | 0.849 ± 0.126 | 0.858 ± 0.130 |
| SVM - poly                         | 0.887 ± 0.093  | 0.927 ± 0.063        | 0.713 ± 0.125 | 0.682 ± 0.113 | 0.841 ± 0.107 | 0.866 ± 0.121 |
| SVM - rbf                          | 0.872 ± 0.144  | 0.859 ± 0.176        | 0.586 ± 0.111 | 0.601 ± 0.121 | 0.839 ± 0.142 | 0.717 ± 0.200 |

Results exclude Nearest Centroid, Passive Aggressive Classifier and Perceptron.

#### 45 S2.4. Cell line U251

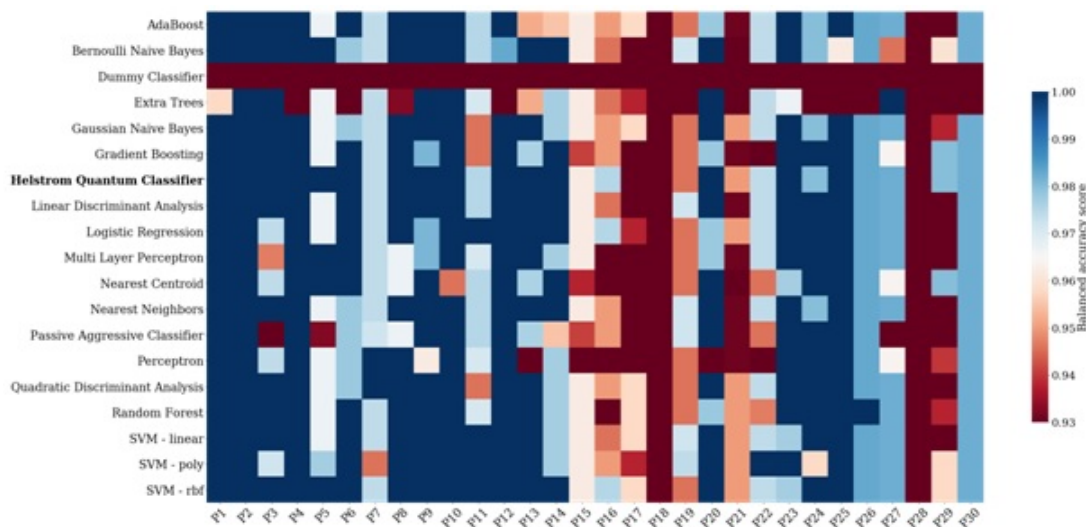

Fig. 2.4.1 | Balance accuracy score of 19 classifiers across 30 homogeneity image feature datasets for cell line U251.

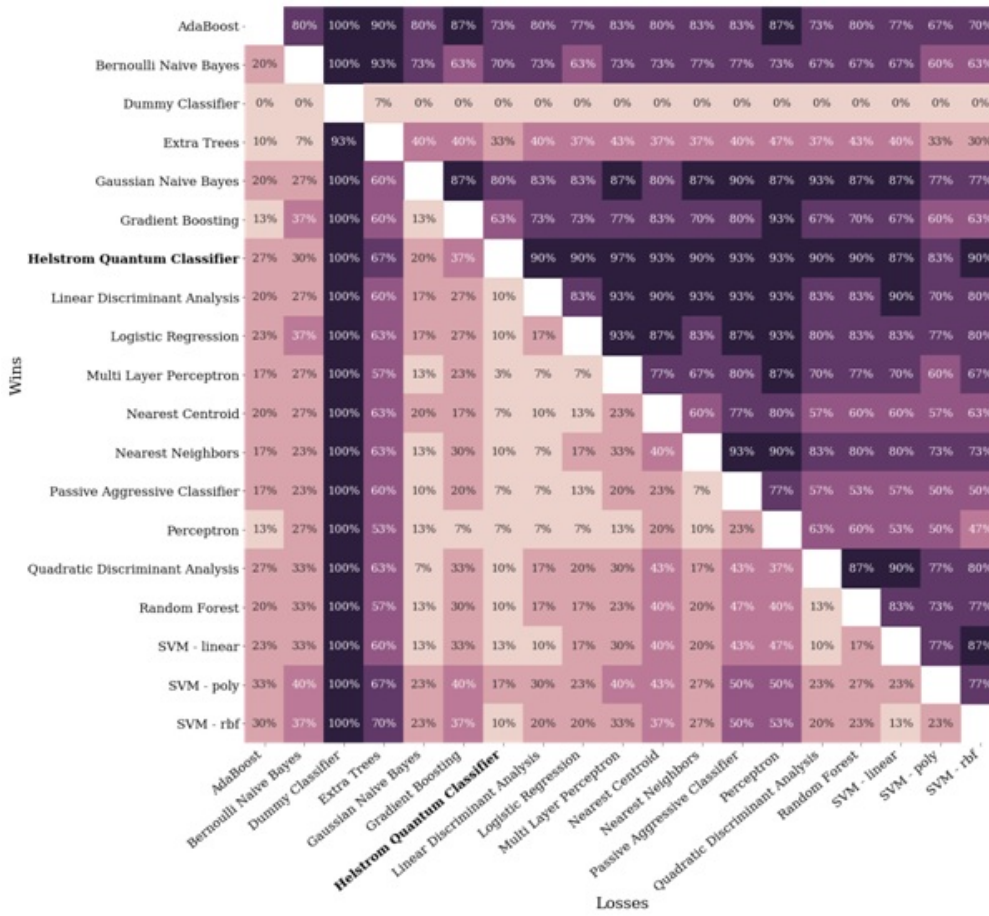

Fig. 2.4.2 | Percentage of datasets where model A (“Wins”) outperformed model B (“Losses”) out of 30 homogeneity image feature datasets for cell line U251 (balanced accuracy score).

| Classifiers                        | Image features |               |               |               |               |                      |
|------------------------------------|----------------|---------------|---------------|---------------|---------------|----------------------|
|                                    | RGB            | L*u*v*        | Contrast      | Correlation   | Energy        | Homogeneity          |
| AdaBoost                           | 0.911 ± 0.049  | 0.909 ± 0.046 | 0.969 ± 0.027 | 0.771 ± 0.081 | 0.968 ± 0.045 | 0.972 ± 0.032        |
| Bernoulli Naive Bayes              | 0.890 ± 0.047  | 0.903 ± 0.043 | 0.934 ± 0.055 | 0.649 ± 0.108 | 0.859 ± 0.118 | 0.967 ± 0.059        |
| Dummy Classifier                   | 0.504 ± 0.068  | 0.494 ± 0.058 | 0.495 ± 0.049 | 0.485 ± 0.057 | 0.495 ± 0.051 | 0.509 ± 0.069        |
| Extra Trees                        | 0.832 ± 0.126  | 0.865 ± 0.098 | 0.714 ± 0.188 | 0.571 ± 0.110 | 0.692 ± 0.206 | 0.867 ± 0.164        |
| Gaussian Naive Bayes               | 0.908 ± 0.052  | 0.912 ± 0.051 | 0.969 ± 0.030 | 0.698 ± 0.084 | 0.964 ± 0.033 | 0.976 ± 0.027        |
| Gradient Boosting                  | 0.917 ± 0.049  | 0.907 ± 0.054 | 0.958 ± 0.034 | 0.845 ± 0.064 | 0.965 ± 0.039 | 0.970 ± 0.035        |
| <b>Helstrom Quantum Classifier</b> | 0.917 ± 0.045  | 0.907 ± 0.039 | 0.966 ± 0.032 | 0.792 ± 0.070 | 0.973 ± 0.024 | <b>0.979 ± 0.029</b> |
| Linear Discriminant Analysis       | 0.892 ± 0.062  | 0.904 ± 0.047 | 0.916 ± 0.065 | 0.674 ± 0.087 | 0.935 ± 0.058 | 0.975 ± 0.036        |
| Logistic Regression                | 0.911 ± 0.051  | 0.918 ± 0.044 | 0.965 ± 0.030 | 0.677 ± 0.087 | 0.964 ± 0.031 | 0.976 ± 0.031        |
| Multi Layer Perceptron             | 0.915 ± 0.045  | 0.924 ± 0.046 | 0.965 ± 0.035 | 0.837 ± 0.087 | 0.968 ± 0.034 | 0.969 ± 0.035        |
| Nearest Centroid                   | 0.892 ± 0.051  | 0.892 ± 0.048 | 0.927 ± 0.033 | 0.694 ± 0.091 | 0.923 ± 0.048 | 0.967 ± 0.038        |
| Nearest Neighbors                  | 0.914 ± 0.046  | 0.907 ± 0.050 | 0.969 ± 0.032 | 0.836 ± 0.078 | 0.974 ± 0.036 | 0.974 ± 0.033        |
| Passive Aggressive Classifier      | 0.875 ± 0.070  | 0.881 ± 0.070 | 0.951 ± 0.050 | 0.575 ± 0.111 | 0.958 ± 0.047 | 0.959 ± 0.046        |
| Perceptron                         | 0.902 ± 0.054  | 0.889 ± 0.060 | 0.945 ± 0.060 | 0.586 ± 0.117 | 0.951 ± 0.039 | 0.952 ± 0.056        |
| Quadratic Discriminant Analysis    | 0.923 ± 0.053  | 0.924 ± 0.051 | 0.972 ± 0.028 | 0.712 ± 0.085 | 0.969 ± 0.033 | 0.976 ± 0.028        |
| Random Forest                      | 0.926 ± 0.048  | 0.918 ± 0.047 | 0.973 ± 0.033 | 0.815 ± 0.086 | 0.970 ± 0.044 | 0.974 ± 0.034        |
| SVM - linear                       | 0.916 ± 0.047  | 0.914 ± 0.051 | 0.970 ± 0.027 | 0.656 ± 0.103 | 0.975 ± 0.028 | 0.976 ± 0.035        |
| SVM - poly                         | 0.925 ± 0.052  | 0.911 ± 0.064 | 0.972 ± 0.027 | 0.821 ± 0.072 | 0.970 ± 0.031 | 0.978 ± 0.025        |
| SVM - rbf                          | 0.913 ± 0.051  | 0.917 ± 0.053 | 0.969 ± 0.032 | 0.667 ± 0.100 | 0.976 ± 0.027 | 0.980 ± 0.033        |

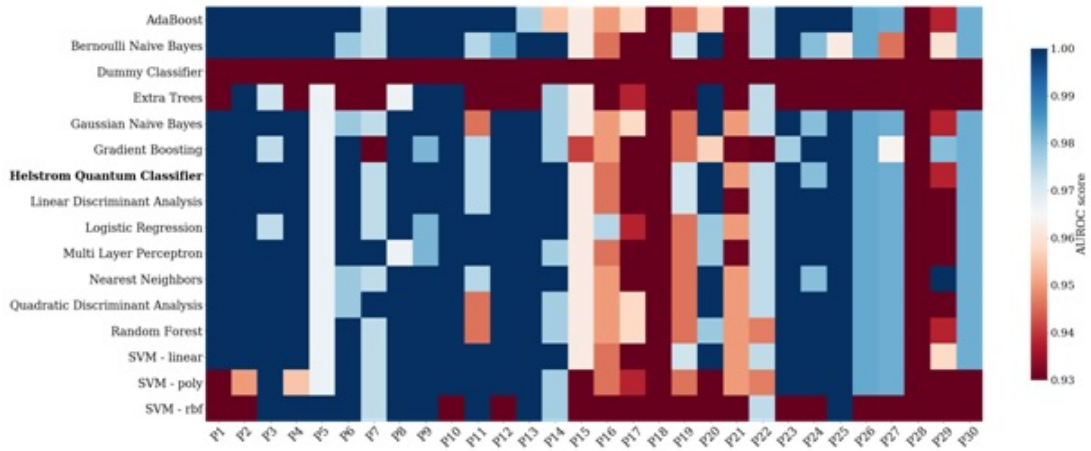

Fig. 2.4.3 | AUROC score of 19 classifiers across 30 homogeneity image feature datasets for cell line U251.

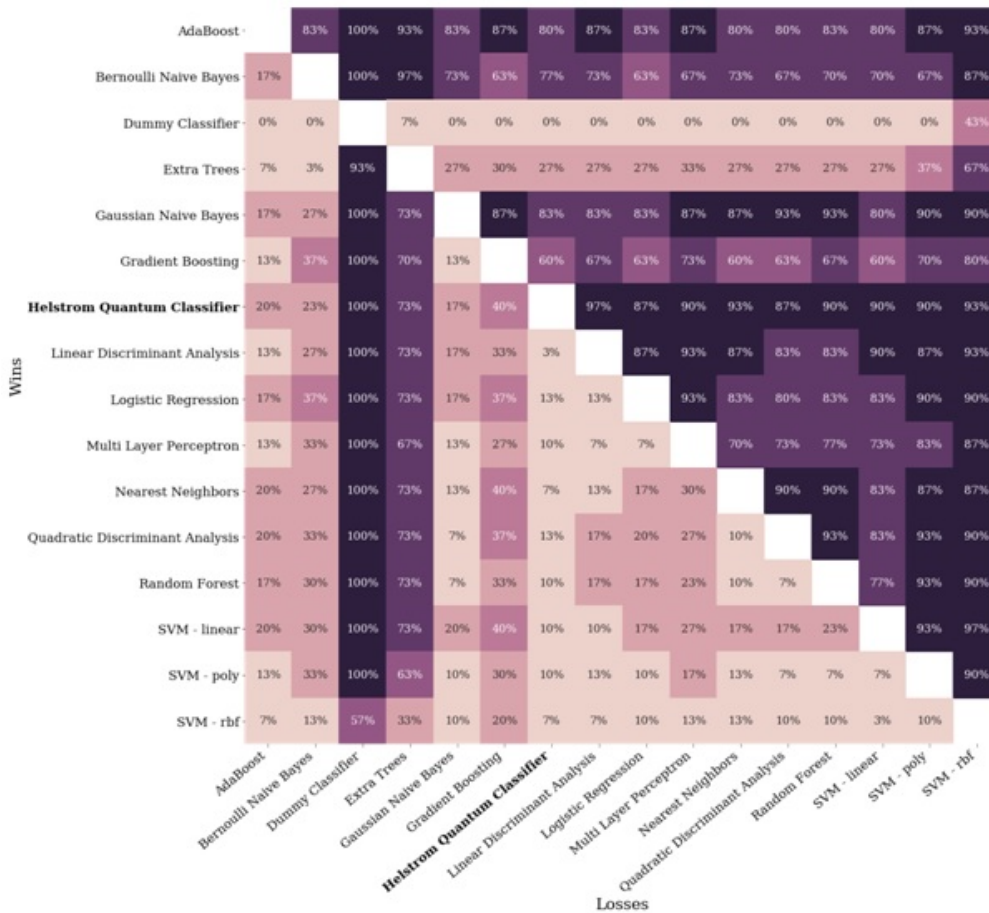

Fig. 2.4.4 | Percentage of datasets where model A (“Wins”) outperformed model B (“Losses”) out of 30 homogeneity image feature datasets for cell line U251 (AUROC score).

**Table 2.4.2 | The mean and standard deviation AUROC score (with respect to 30 datasets) for cell line U251**

| Classifiers                        | Image features |               |               |               |               |                      |
|------------------------------------|----------------|---------------|---------------|---------------|---------------|----------------------|
|                                    | RGB            | L*u*v*        | Contrast      | Correlation   | Energy        | Homogeneity          |
| AdaBoost                           | 0.920 ± 0.046  | 0.911 ± 0.048 | 0.971 ± 0.027 | 0.741 ± 0.099 | 0.967 ± 0.045 | 0.975 ± 0.034        |
| Bernoulli Naive Bayes              | 0.890 ± 0.047  | 0.903 ± 0.043 | 0.934 ± 0.055 | 0.649 ± 0.108 | 0.859 ± 0.118 | 0.967 ± 0.059        |
| Dummy Classifier                   | 0.500 ± 0.050  | 0.492 ± 0.049 | 0.499 ± 0.059 | 0.502 ± 0.054 | 0.503 ± 0.055 | 0.511 ± 0.055        |
| Extra Trees                        | 0.808 ± 0.152  | 0.843 ± 0.110 | 0.653 ± 0.177 | 0.558 ± 0.098 | 0.673 ± 0.186 | 0.838 ± 0.155        |
| Gaussian Naive Bayes               | 0.908 ± 0.052  | 0.912 ± 0.051 | 0.969 ± 0.030 | 0.698 ± 0.084 | 0.964 ± 0.033 | 0.976 ± 0.027        |
| Gradient Boosting                  | 0.924 ± 0.052  | 0.906 ± 0.046 | 0.964 ± 0.031 | 0.830 ± 0.060 | 0.966 ± 0.040 | 0.968 ± 0.034        |
| <b>Helstrom Quantum Classifier</b> | 0.899 ± 0.057  | 0.907 ± 0.053 | 0.948 ± 0.063 | 0.797 ± 0.093 | 0.966 ± 0.031 | <b>0.978 ± 0.027</b> |
| Linear Discriminant Analysis       | 0.892 ± 0.062  | 0.904 ± 0.047 | 0.916 ± 0.065 | 0.674 ± 0.087 | 0.935 ± 0.058 | 0.975 ± 0.036        |
| Logistic Regression                | 0.911 ± 0.050  | 0.917 ± 0.046 | 0.962 ± 0.030 | 0.676 ± 0.088 | 0.962 ± 0.036 | 0.975 ± 0.034        |
| Multi Layer Perceptron             | 0.921 ± 0.046  | 0.918 ± 0.051 | 0.965 ± 0.034 | 0.830 ± 0.093 | 0.962 ± 0.034 | 0.971 ± 0.040        |
| Nearest Neighbors                  | 0.914 ± 0.051  | 0.907 ± 0.050 | 0.964 ± 0.040 | 0.823 ± 0.062 | 0.972 ± 0.036 | 0.978 ± 0.028        |
| Quadratic Discriminant Analysis    | 0.923 ± 0.053  | 0.924 ± 0.051 | 0.972 ± 0.028 | 0.712 ± 0.085 | 0.969 ± 0.033 | 0.976 ± 0.028        |
| Random Forest                      | 0.921 ± 0.050  | 0.925 ± 0.049 | 0.975 ± 0.025 | 0.836 ± 0.076 | 0.973 ± 0.038 | 0.972 ± 0.035        |
| SVM - linear                       | 0.916 ± 0.049  | 0.909 ± 0.047 | 0.962 ± 0.030 | 0.651 ± 0.103 | 0.971 ± 0.030 | 0.978 ± 0.035        |
| SVM - poly                         | 0.897 ± 0.063  | 0.901 ± 0.062 | 0.952 ± 0.061 | 0.801 ± 0.089 | 0.969 ± 0.030 | 0.955 ± 0.051        |
| SVM - rbf                          | 0.849 ± 0.150  | 0.833 ± 0.156 | 0.776 ± 0.221 | 0.634 ± 0.114 | 0.871 ± 0.189 | 0.723 ± 0.240        |

Results exclude Nearest Centroid, Passive Aggressive Classifier and Perceptron.

### S3. Performance of HQC on a new unseen test set (for the best image feature for each cell line)

In this sub-experiment the trained HQC model was tested on a new unseen test set extracted from the remaining 99.8% of the datasets. This experiment was done by randomly selecting 10 datasets (out of the 30 datasets) from the best performing image feature for each of the four cell lines. We show a comparison of the performance on this new unseen test set against the performance on the test set from the 0.2% random sample used in the main experiment.

**Table 3.1 | Balance accuracy and AUROC score for HQC on the test set used in the experiment and a new unseen test set for 10 randomly selected homogeneity image feature datasets for cell line MDA-MD-231**

| Datasets | Balanced accuracy               | Balanced accuracy   | AUROC                           | AUROC               |
|----------|---------------------------------|---------------------|---------------------------------|---------------------|
|          | Test set used in the experiment | New unseen test set | Test set used in the experiment | New unseen test set |
| P5       | 0.900                           | 0.943               | 0.900                           | 0.943               |
| P6       | 0.977                           | 0.921               | 0.977                           | 0.921               |
| P7       | 0.916                           | 0.897               | 0.946                           | 0.896               |
| P8       | 0.944                           | 0.937               | 0.911                           | 0.943               |
| P14      | 0.971                           | 0.935               | 1.000                           | 0.933               |
| P15      | 0.921                           | 0.869               | 0.947                           | 0.888               |
| P23      | 0.955                           | 0.968               | 0.955                           | 0.967               |
| P26      | 0.977                           | 0.947               | 0.955                           | 0.944               |
| P27      | 0.974                           | 0.953               | 0.946                           | 0.951               |
| P30      | 0.971                           | 0.951               | 0.853                           | 0.811               |
| Mean     | 0.951                           | 0.932               | 0.939                           | 0.920               |

**Table 3.2 | Balance accuracy and AUROC score for HQC on the test set used in the experiment and a new unseen test set for 10 randomly selected homogeneity image feature datasets for cell line U87-MG**

| Datasets | Balanced accuracy               | Balanced accuracy   | AUROC                           | AUROC               |
|----------|---------------------------------|---------------------|---------------------------------|---------------------|
|          | Test set used in the experiment | New unseen test set | Test set used in the experiment | New unseen test set |
| P1       | 0.931                           | 0.947               | 0.931                           | 0.947               |
| P2       | 0.985                           | 0.953               | 0.985                           | 0.954               |
| P5       | 0.869                           | 0.908               | 0.869                           | 0.908               |
| P9       | 0.943                           | 0.928               | 0.943                           | 0.940               |
| P10      | 0.891                           | 0.894               | 0.891                           | 0.897               |
| P14      | 0.898                           | 0.868               | 0.898                           | 0.870               |
| P21      | 0.964                           | 0.910               | 0.929                           | 0.901               |
| P22      | 0.867                           | 0.868               | 0.839                           | 0.870               |
| P25      | 0.871                           | 0.893               | 0.871                           | 0.893               |
| P27      | 0.980                           | 0.869               | 0.960                           | 0.871               |
| Mean     | 0.920                           | 0.904               | 0.912                           | 0.905               |

**Table 3.3 | Balance accuracy and AUROC score for HQC on the test set used in the experiment and a new unseen test set for 10 randomly selected L\*u\*v\* image feature datasets for cell line MCF7**

| Datasets | Balanced accuracy               | Balanced accuracy   | AUROC                           | AUROC               |
|----------|---------------------------------|---------------------|---------------------------------|---------------------|
|          | Test set used in the experiment | New unseen test set | Test set used in the experiment | New unseen test set |
| P6       | 0.958                           | 0.955               | 1.000                           | 0.958               |
| P8       | 0.938                           | 0.949               | 0.980                           | 0.951               |
| P9       | 0.982                           | 0.958               | 0.982                           | 0.955               |
| P13      | 0.958                           | 0.966               | 0.979                           | 0.970               |
| P14      | 0.960                           | 0.978               | 0.960                           | 0.978               |
| P16      | 0.984                           | 0.959               | 0.984                           | 0.951               |
| P19      | 0.985                           | 0.977               | 0.985                           | 0.976               |
| P23      | 0.984                           | 0.967               | 0.884                           | 0.947               |
| P25      | 0.875                           | 0.867               | 0.879                           | 0.886               |
| P26      | 0.946                           | 0.980               | 0.971                           | 0.946               |
| Mean     | 0.957                           | 0.956               | 0.960                           | 0.952               |

**Table 3.4 | Balance accuracy and AUROC score for HQC on the test set used in the experiment and a new unseen test set for 10 randomly selected homogeneity image feature datasets for cell line U251**

| Datasets | Balanced accuracy               | Balanced accuracy   | AUROC                           | AUROC               |
|----------|---------------------------------|---------------------|---------------------------------|---------------------|
|          | Test set used in the experiment | New unseen test set | Test set used in the experiment | New unseen test set |
| P2       | 1.000                           | 0.985               | 1.000                           | 0.977               |
| P7       | 0.974                           | 0.962               | 0.974                           | 0.962               |
| P15      | 0.962                           | 0.956               | 0.962                           | 0.898               |
| P18      | 0.927                           | 0.971               | 0.927                           | 0.971               |
| P20      | 1.000                           | 0.960               | 1.000                           | 0.959               |
| P21      | 0.950                           | 0.964               | 0.950                           | 0.964               |
| P22      | 0.974                           | 0.941               | 0.974                           | 0.948               |
| P27      | 0.982                           | 0.965               | 0.982                           | 0.973               |
| P29      | 0.980                           | 0.926               | 0.938                           | 0.932               |
| P30      | 0.982                           | 0.976               | 0.982                           | 0.968               |
| Mean     | 0.973                           | 0.961               | 0.969                           | 0.955               |

# S4. Experimental results - extended version

This section contains tables showing the experimental results for the balanced accuracy and AUROC scores for the six image features *RGB*, *L\*u\*v\**, *contrast*, *correlation*, *energy* and *homogeneity*, for each of the four cell lines MDA-MD-231, U87-MG, MCF7 and U251 respectively.

**Table 4.1 | Balanced accuracy score for 30 RGB image feature datasets for cell line MDA-MD-231**

| Classifiers                     | P1    | P2    | P3    | P4    | P5    | P6    | P7    | P8    | P9    | P10   | P11   | P12   | P13   | P14   | P15   | P16   | P17   | P18   | P19   | P20   | P21   | P22   | P23   | P24   | P25   | P26   | P27   | P28   | P29   | P30   |
|---------------------------------|-------|-------|-------|-------|-------|-------|-------|-------|-------|-------|-------|-------|-------|-------|-------|-------|-------|-------|-------|-------|-------|-------|-------|-------|-------|-------|-------|-------|-------|-------|
| AdaBoost                        | 0.734 | 0.789 | 0.875 | 0.943 | 0.890 | 0.804 | 0.895 | 0.796 | 0.866 | 0.898 | 0.846 | 0.967 | 0.795 | 0.906 | 0.757 | 0.769 | 0.898 | 0.941 | 0.849 | 0.921 | 0.864 | 0.921 | 0.978 | 0.835 | 0.952 | 0.871 | 0.947 | 0.913 | 0.918 | 0.895 |
| Bernoulli Naïve Bayes           | 0.904 | 0.866 | 0.844 | 0.907 | 0.906 | 0.804 | 0.784 | 0.750 | 0.701 | 0.712 | 0.918 | 0.944 | 0.692 | 0.859 | 0.741 | 0.824 | 0.932 | 0.878 | 0.842 | 0.941 | 0.727 | 0.899 | 0.938 | 0.881 | 0.871 | 0.946 | 0.863 | 0.918 | 0.946 |       |
| Decision Tree                   | 0.732 | 0.756 | 0.755 | 0.897 | 0.889 | 0.850 | 0.850 | 0.850 | 0.850 | 0.850 | 0.850 | 0.850 | 0.850 | 0.850 | 0.850 | 0.850 | 0.850 | 0.850 | 0.850 | 0.850 | 0.850 | 0.850 | 0.850 | 0.850 | 0.850 | 0.850 | 0.850 | 0.850 | 0.850 |       |
| Extra Trees                     | 0.855 | 0.577 | 0.500 | 0.835 | 0.917 | 0.742 | 0.938 | 0.938 | 0.938 | 0.938 | 0.938 | 0.938 | 0.938 | 0.938 | 0.938 | 0.938 | 0.938 | 0.938 | 0.938 | 0.938 | 0.938 | 0.938 | 0.938 | 0.938 | 0.938 | 0.938 | 0.938 | 0.938 | 0.938 |       |
| Gaussian Naïve Bayes            | 0.795 | 0.816 | 0.804 | 0.897 | 0.917 | 0.742 | 0.850 | 0.938 | 0.821 | 0.789 | 0.871 | 0.955 | 0.817 | 0.742 | 0.938 | 0.946 | 0.904 | 0.946 | 0.904 | 0.890 | 0.947 | 0.807 | 0.913 | 0.851 | 0.899 | 0.960 | 0.871 | 0.846 | 0.846 |       |
| Gradient Boosting               | 0.917 | 0.763 | 0.685 | 0.851 | 0.890 | 0.753 | 0.818 | 0.969 | 0.885 | 0.882 | 0.705 | 0.925 | 0.896 | 0.792 | 0.938 | 0.971 | 0.897 | 0.858 | 0.866 | 0.943 | 0.100 | 0.890 | 0.947 | 0.863 | 0.931 | 0.851 | 0.899 | 0.960 | 0.871 |       |
| Holdout Quantum Classifier      | 0.918 | 0.816 | 0.820 | 0.866 | 0.899 | 0.841 | 0.914 | 0.938 | 0.864 | 0.851 | 0.893 | 0.885 | 0.897 | 0.925 | 0.734 | 0.880 | 0.921 | 0.825 | 0.950 | 0.921 | 0.779 | 0.935 | 0.889 | 0.835 | 0.963 | 0.812 | 0.943 | 0.980 | 0.841 |       |
| Linear Discriminant Analysis    | 0.837 | 0.857 | 0.734 | 0.842 | 0.917 | 0.764 | 0.866 | 0.938 | 0.871 | 0.819 | 0.789 | 0.889 | 0.891 | 0.878 | 0.887 | 0.971 | 0.885 | 0.688 | 0.850 | 0.831 | 0.825 | 0.835 | 0.825 | 0.835 | 0.756 | 0.881 | 0.812 | 0.899 | 0.940 | 0.866 |
| Logistic Regression             | 0.857 | 0.920 | 0.817 | 0.890 | 0.917 | 0.798 | 0.882 | 0.938 | 0.871 | 0.819 | 0.789 | 0.889 | 0.891 | 0.878 | 0.887 | 0.971 | 0.885 | 0.688 | 0.850 | 0.831 | 0.825 | 0.835 | 0.825 | 0.835 | 0.756 | 0.881 | 0.812 | 0.899 | 0.940 | 0.866 |
| Multi Layer Perceptron          | 0.857 | 0.820 | 0.817 | 0.890 | 0.917 | 0.798 | 0.882 | 0.938 | 0.871 | 0.819 | 0.789 | 0.889 | 0.891 | 0.878 | 0.887 | 0.971 | 0.885 | 0.688 | 0.850 | 0.831 | 0.825 | 0.835 | 0.825 | 0.835 | 0.756 | 0.881 | 0.812 | 0.899 | 0.940 | 0.866 |
| Nearest Centroid                | 0.797 | 0.812 | 0.804 | 0.784 | 0.889 | 0.741 | 0.897 | 0.906 | 0.827 | 0.844 | 0.867 | 0.849 | 0.916 | 0.791 | 0.742 | 0.897 | 0.946 | 0.827 | 0.716 | 0.850 | 0.764 | 0.825 | 0.890 | 0.811 | 0.808 | 0.913 | 0.812 | 0.856 | 0.918 | 0.846 |
| Nearest Neighbors               | 0.857 | 0.688 | 0.702 | 0.870 | 0.917 | 0.855 | 0.839 | 0.929 | 0.844 | 0.867 | 0.849 | 0.909 | 0.921 | 0.814 | 0.834 | 0.946 | 0.827 | 0.716 | 0.850 | 0.764 | 0.825 | 0.890 | 0.811 | 0.808 | 0.913 | 0.812 | 0.856 | 0.918 | 0.846 |       |
| Passive Aggressive Classifier   | 0.795 | 0.734 | 0.888 | 0.914 | 0.863 | 0.508 | 0.890 | 0.890 | 0.762 | 0.411 | 0.732 | 0.685 | 0.878 | 0.744 | 0.778 | 0.918 | 0.946 | 0.885 | 0.750 | 0.770 | 0.979 | 0.916 | 0.833 | 0.890 | 0.963 | 0.827 | 0.834 | 1.000 | 0.959 |       |
| Perceptron                      | 0.687 | 0.647 | 0.890 | 0.882 | 0.911 | 0.655 | 0.750 | 0.897 | 0.821 | 0.621 | 0.825 | 0.684 | 0.684 | 0.562 | 0.562 | 0.734 | 0.778 | 0.694 | 0.814 | 0.941 | 0.753 | 0.861 | 0.756 | 0.881 | 0.975 | 0.871 | 0.980 | 0.891 | 0.871 |       |
| Quadratic Discriminant Analysis | 0.845 | 0.855 | 0.855 | 0.855 | 0.855 | 0.855 | 0.855 | 0.855 | 0.855 | 0.855 | 0.855 | 0.855 | 0.855 | 0.855 | 0.855 | 0.855 | 0.855 | 0.855 | 0.855 | 0.855 | 0.855 | 0.855 | 0.855 | 0.855 | 0.855 | 0.855 | 0.855 | 0.855 | 0.855 |       |
| Random Forest                   | 0.875 | 0.798 | 0.614 | 0.914 | 0.917 | 0.798 | 0.669 | 0.838 | 0.851 | 0.851 | 0.851 | 0.851 | 0.851 | 0.851 | 0.851 | 0.851 | 0.851 | 0.851 | 0.851 | 0.851 | 0.851 | 0.851 | 0.851 | 0.851 | 0.851 | 0.851 | 0.851 | 0.851 | 0.851 |       |
| SVM - linear                    | 0.857 | 0.788 | 0.884 | 0.914 | 0.917 | 0.798 | 0.669 | 0.838 | 0.851 | 0.851 | 0.851 | 0.851 | 0.851 | 0.851 | 0.851 | 0.851 | 0.851 | 0.851 | 0.851 | 0.851 | 0.851 | 0.851 | 0.851 | 0.851 | 0.851 | 0.851 | 0.851 | 0.851 | 0.851 |       |
| SVM - poly                      | 0.835 | 0.784 | 0.868 | 0.859 | 0.917 | 0.798 | 0.669 | 0.838 | 0.851 | 0.851 | 0.851 | 0.851 | 0.851 | 0.851 | 0.851 | 0.851 | 0.851 | 0.851 | 0.851 | 0.851 | 0.851 | 0.851 | 0.851 | 0.851 | 0.851 | 0.851 | 0.851 | 0.851 | 0.851 |       |
| SVM - rbf                       | 0.857 | 0.857 | 0.884 | 0.914 | 0.889 | 0.753 | 0.859 | 0.938 | 0.857 | 0.757 | 0.788 | 0.842 | 0.935 | 0.925 | 0.778 | 0.938 | 0.971 | 0.885 | 0.795 | 0.871 | 0.835 | 0.962 | 0.890 | 0.944 | 0.947 | 0.890 | 0.935 | 0.960 | 0.896 |       |

**Table 4.2 | Balanced accuracy score for 30 L\*u\*v\* image feature datasets for cell line MDA-MD-231**

| Classifiers                     | P1    | P2    | P3    | P4    | P5    | P6    | P7    | P8    | P9    | P10   | P11   | P12   | P13   | P14   | P15   | P16   | P17   | P18   | P19   | P20   | P21   | P22   | P23   | P24   | P25   | P26   | P27   | P28   | P29   | P30   |
|---------------------------------|-------|-------|-------|-------|-------|-------|-------|-------|-------|-------|-------|-------|-------|-------|-------|-------|-------|-------|-------|-------|-------|-------|-------|-------|-------|-------|-------|-------|-------|-------|
| AdaBoost                        | 0.734 | 0.789 | 0.875 | 0.943 | 0.890 | 0.804 | 0.895 | 0.796 | 0.866 | 0.898 | 0.846 | 0.967 | 0.795 | 0.906 | 0.757 | 0.769 | 0.898 | 0.941 | 0.849 | 0.921 | 0.864 | 0.921 | 0.978 | 0.835 | 0.952 | 0.871 | 0.947 | 0.913 | 0.918 | 0.895 |
| Bernoulli Naïve Bayes           | 0.904 | 0.866 | 0.844 | 0.907 | 0.906 | 0.804 | 0.784 | 0.750 | 0.701 | 0.712 | 0.918 | 0.944 | 0.692 | 0.859 | 0.741 | 0.824 | 0.932 | 0.878 | 0.842 | 0.941 | 0.727 | 0.899 | 0.938 | 0.881 | 0.871 | 0.946 | 0.863 | 0.918 | 0.946 |       |
| Decision Tree                   | 0.732 | 0.756 | 0.755 | 0.897 | 0.889 | 0.850 | 0.850 | 0.850 | 0.850 | 0.850 | 0.850 | 0.850 | 0.850 | 0.850 | 0.850 | 0.850 | 0.850 | 0.850 | 0.850 | 0.850 | 0.850 | 0.850 | 0.850 | 0.850 | 0.850 | 0.850 | 0.850 | 0.850 | 0.850 |       |
| Extra Trees                     | 0.855 | 0.577 | 0.500 | 0.835 | 0.917 | 0.742 | 0.938 | 0.938 | 0.938 | 0.938 | 0.938 | 0.938 | 0.938 | 0.938 | 0.938 | 0.938 | 0.938 | 0.938 | 0.938 | 0.938 | 0.938 | 0.938 | 0.938 | 0.938 | 0.938 | 0.938 | 0.938 | 0.938 | 0.938 |       |
| Gaussian Naïve Bayes            | 0.795 | 0.816 | 0.804 | 0.897 | 0.917 | 0.742 | 0.850 | 0.938 | 0.821 | 0.789 | 0.871 | 0.955 | 0.817 | 0.742 | 0.938 | 0.946 | 0.904 | 0.946 | 0.904 | 0.890 | 0.947 | 0.807 | 0.913 | 0.851 | 0.899 | 0.960 | 0.871 | 0.846 | 0.846 |       |
| Gradient Boosting               | 0.917 | 0.763 | 0.685 | 0.851 | 0.890 | 0.753 | 0.818 | 0.969 | 0.885 | 0.882 | 0.705 | 0.925 | 0.896 | 0.792 | 0.938 | 0.971 | 0.897 | 0.858 | 0.866 | 0.943 | 0.100 | 0.890 | 0.947 | 0.863 | 0.931 | 0.851 | 0.899 | 0.960 | 0.871 |       |
| Holdout Quantum Classifier      | 0.918 | 0.816 | 0.820 | 0.866 | 0.899 | 0.841 | 0.914 | 0.938 | 0.864 | 0.851 | 0.893 | 0.885 | 0.897 | 0.925 | 0.734 | 0.880 | 0.921 | 0.825 | 0.950 | 0.921 | 0.779 | 0.935 | 0.889 | 0.835 | 0.963 | 0.812 | 0.943 | 0.980 | 0.841 |       |
| Linear Discriminant Analysis    | 0.837 | 0.857 | 0.734 | 0.842 | 0.917 | 0.764 | 0.866 | 0.938 | 0.871 | 0.819 | 0.789 | 0.889 | 0.891 | 0.878 | 0.887 | 0.971 | 0.885 | 0.688 | 0.850 | 0.831 | 0.825 | 0.835 | 0.825 | 0.835 | 0.756 | 0.881 | 0.812 | 0.899 | 0.940 | 0.866 |
| Logistic Regression             | 0.857 | 0.920 | 0.817 | 0.890 | 0.917 | 0.798 | 0.882 | 0.938 | 0.871 | 0.819 | 0.789 | 0.889 | 0.891 | 0.878 | 0.887 | 0.971 | 0.885 | 0.688 | 0.850 | 0.831 | 0.825 | 0.835 | 0.825 | 0.835 | 0.756 | 0.881 | 0.812 | 0.899 | 0.940 | 0.866 |
| Multi Layer Perceptron          | 0.857 | 0.820 | 0.817 | 0.890 | 0.917 | 0.798 | 0.882 | 0.938 | 0.871 | 0.819 | 0.789 | 0.889 | 0.891 | 0.878 | 0.887 | 0.971 | 0.885 | 0.688 | 0.850 | 0.831 | 0.825 | 0.835 | 0.825 | 0.835 | 0.756 | 0.881 | 0.812 | 0.899 | 0.940 | 0.866 |
| Nearest Centroid                | 0.797 | 0.812 | 0.804 | 0.784 | 0.889 | 0.741 | 0.897 | 0.906 | 0.827 | 0.844 | 0.867 | 0.849 | 0.916 | 0.791 | 0.742 | 0.897 | 0.946 | 0.827 | 0.716 | 0.850 | 0.764 | 0.825 | 0.890 | 0.811 | 0.808 | 0.913 | 0.812 | 0.856 | 0.918 | 0.846 |
| Nearest Neighbors               | 0.857 | 0.688 | 0.702 | 0.870 | 0.917 | 0.855 | 0.839 | 0.929 | 0.844 | 0.867 | 0.849 | 0.909 | 0.921 | 0.814 | 0.834 | 0.946 | 0.827 | 0.716 | 0.850 | 0.764 | 0.825 | 0.890 | 0.811 | 0.808 | 0.913 | 0.812 | 0.856 | 0.918 | 0.846 |       |
| Passive Aggressive Classifier   | 0.795 | 0.734 | 0.888 | 0.914 | 0.863 | 0.508 | 0.890 | 0.890 | 0.762 | 0.411 | 0.732 | 0.685 | 0.878 | 0.744 | 0.778 | 0.918 | 0.946 | 0.885 | 0.750 | 0.770 | 0.979 | 0.916 | 0.833 | 0.890 | 0.963 | 0.827 | 0.834 | 1.000 | 0.959 |       |
| Perceptron                      | 0.687 | 0.647 | 0.890 | 0.882 | 0.911 | 0.655 | 0.750 | 0.897 | 0.821 | 0.621 | 0.825 | 0.684 | 0.684 | 0.562 | 0.562 | 0.734 | 0.778 | 0.694 | 0.814 | 0.941 | 0.753 | 0.861 | 0.756 | 0.881 | 0.975 | 0.871 | 0.980 | 0.891 | 0.871 |       |
| Quadratic Discriminant Analysis | 0.845 | 0.855 | 0.855 | 0.855 | 0.855 | 0.855 | 0.855 | 0.855 | 0.855 | 0.855 | 0.855 | 0.855 | 0.855 | 0.855 | 0.855 | 0.855 | 0.855 | 0.855 | 0.855 | 0.855 | 0.855 | 0.855 | 0.855 | 0.855 | 0.855 | 0.855 | 0.855 | 0.855 | 0.855 |       |
| Random Forest                   | 0.875 | 0.798 | 0.614 | 0.914 | 0.917 | 0.798 | 0.669 | 0.838 | 0.851 | 0.851 | 0.851 | 0.851 | 0.851 | 0.851 | 0.851 | 0.851 | 0.851 | 0.851 | 0.851 | 0.851 | 0.851 | 0.851 | 0.851 | 0.851 | 0.851 | 0.851 | 0.851 | 0.851 | 0.851 |       |
| SVM - linear                    | 0.857 | 0.788 | 0.884 | 0.914 | 0.917 | 0.798 | 0.669 | 0.838 | 0.851 | 0.851 | 0.851 | 0.851 | 0.851 | 0.851 | 0.851 | 0.851 | 0.851 | 0.851 | 0.851 | 0.851 | 0.851 | 0.851 | 0.851 | 0.851 | 0.851 | 0.851 | 0.851 | 0.851 | 0.851 |       |
| SVM - poly                      | 0.835 | 0.784 | 0.868 | 0.859 | 0.917 | 0.798 | 0.669 | 0.838 | 0.851 | 0.851 | 0.851 | 0.851 | 0.851 | 0.851 | 0.851 | 0.851 | 0.851 | 0.851 | 0.851 | 0.851 | 0.851 | 0.851 | 0.851 | 0.851 | 0.851 | 0.851 | 0.851 | 0.851 | 0.851 |       |
| SVM - rbf                       | 0.857 | 0.857 | 0.884 | 0.914 | 0.889 | 0.753 | 0.859 | 0.938 | 0.857 |       |       |       |       |       |       |       |       |       |       |       |       |       |       |       |       |       |       |       |       |       |





**Table 4.10 | AUROC score for 30 contrast image feature datasets for cell line MDA-MB-231**

| Classifiers                   | P1    | P2    | P3    | P4    | P5    | P6    | P7    | P8    | P9    | P10   | P11   | P12   | P13   | P14   | P15   | P16   | P17   | P18   | P19   | P20   | P21   | P22   | P23   | P24   | P25   | P26   | P27   | P28   | P29   | P30   |       |
|-------------------------------|-------|-------|-------|-------|-------|-------|-------|-------|-------|-------|-------|-------|-------|-------|-------|-------|-------|-------|-------|-------|-------|-------|-------|-------|-------|-------|-------|-------|-------|-------|-------|
| AdaBoost                      | 0.835 | 0.823 | 0.879 | 0.918 | 0.866 | 0.744 | 0.829 | 0.820 | 0.853 | 0.943 | 0.881 | 0.946 | 0.883 | 0.890 | 0.820 | 0.863 | 0.864 | 0.897 | 0.691 | 0.833 | 1.000 | 0.835 | 0.770 | 0.750 | 0.598 | 0.745 | 0.863 | 0.826 | 0.731 | 0.717 | 0.730 |
| Bernoulli Naive Bayes         | 0.817 | 0.857 | 0.500 | 0.438 | 0.431 | 0.500 | 0.500 | 0.490 | 0.500 | 0.463 | 0.788 | 0.882 | 0.875 | 0.890 | 0.839 | 0.739 | 0.800 | 0.933 | 0.929 | 0.909 | 0.918 | 0.890 | 0.850 | 0.784 | 0.771 | 0.944 | 0.824 | 0.925 | 0.921 | 0.699 | 0.886 |
| Dummy Classifier              | 0.500 | 0.500 | 0.500 | 0.500 | 0.500 | 0.500 | 0.500 | 0.500 | 0.500 | 0.500 | 0.500 | 0.500 | 0.500 | 0.500 | 0.500 | 0.500 | 0.500 | 0.500 | 0.500 | 0.500 | 0.500 | 0.500 | 0.500 | 0.500 | 0.500 | 0.500 | 0.500 | 0.500 | 0.500 | 0.500 |       |
| Extra Trees                   | 0.817 | 0.886 | 0.862 | 0.918 | 0.789 | 0.782 | 0.881 | 0.888 | 0.875 | 0.821 | 0.914 | 0.975 | 0.890 | 0.839 | 0.818 | 0.800 | 0.933 | 0.945 | 0.969 | 0.909 | 0.974 | 1.000 | 0.921 | 0.899 | 0.866 | 0.977 | 0.857 | 0.941 | 0.850 | 1.000 | 0.955 |
| Gaussian Naive Bayes          | 0.891 | 0.823 | 0.879 | 0.918 | 0.938 | 0.719 | 0.929 | 0.865 | 0.897 | 0.878 | 0.905 | 0.946 | 0.832 | 0.892 | 0.819 | 0.784 | 0.967 | 0.890 | 0.909 | 0.974 | 1.000 | 0.921 | 0.899 | 0.866 | 0.977 | 0.857 | 0.941 | 0.850 | 1.000 | 0.977 | 1.000 |
| Gradient Boosting             | 0.911 | 0.765 | 0.912 | 0.944 | 0.820 | 0.816 | 0.881 | 0.911 | 0.906 | 0.929 | 0.952 | 0.950 | 0.836 | 0.839 | 0.861 | 0.784 | 0.833 | 0.952 | 0.909 | 0.972 | 0.972 | 0.896 | 0.920 | 0.821 | 0.967 | 0.857 | 0.941 | 0.850 | 0.945 | 1.000 | 0.977 |
| Helium Quantum Classifier     | 0.800 | 0.795 | 0.643 | 0.917 | 0.695 | 0.807 | 0.802 | 0.855 | 0.847 | 0.857 | 0.882 | 0.900 | 0.865 | 0.861 | 0.800 | 0.867 | 0.842 | 0.772 | 0.972 | 0.762 | 0.875 | 0.724 | 0.771 | 0.967 | 0.794 | 0.950 | 0.859 | 0.965 | 0.909 | 0.909 |       |
| Linear Discriminant Analysis  | 0.873 | 0.838 | 0.895 | 0.890 | 0.789 | 0.715 | 0.887 | 0.888 | 0.878 | 0.907 | 0.888 | 0.925 | 0.921 | 0.890 | 0.839 | 0.800 | 0.945 | 0.818 | 0.972 | 0.895 | 0.950 | 0.843 | 0.821 | 0.977 | 0.824 | 0.975 | 0.929 | 1.000 | 0.955 | 1.000 | 0.955 |
| Multi Layer Perceptron        | 0.891 | 0.886 | 0.845 | 0.890 | 0.839 | 0.715 | 0.897 | 0.888 | 0.858 | 0.964 | 0.929 | 0.921 | 0.890 | 0.839 | 0.800 | 0.945 | 0.818 | 0.972 | 0.895 | 0.950 | 0.920 | 0.843 | 0.821 | 0.977 | 0.824 | 0.975 | 0.929 | 1.000 | 0.955 | 1.000 | 0.955 |
| Nearest-Neighbors             | 0.840 | 0.800 | 0.830 | 0.861 | 0.830 | 0.722 | 0.857 | 0.860 | 0.860 | 0.860 | 0.860 | 0.860 | 0.860 | 0.860 | 0.860 | 0.860 | 0.860 | 0.860 | 0.860 | 0.860 | 0.860 | 0.860 | 0.860 | 0.860 | 0.860 | 0.860 | 0.860 | 0.860 | 0.860 | 0.860 | 0.860 |
| Nearest-Discriminant Analysis | 0.817 | 0.868 | 0.839 | 0.890 | 0.839 | 0.715 | 0.897 | 0.888 | 0.858 | 0.964 | 0.929 | 0.921 | 0.890 | 0.839 | 0.800 | 0.945 | 0.818 | 0.972 | 0.895 | 0.950 | 0.920 | 0.843 | 0.821 | 0.977 | 0.824 | 0.975 | 0.929 | 1.000 | 0.955 | 1.000 | 0.955 |
| Random Forest                 | 0.855 | 0.823 | 0.895 | 0.918 | 0.883 | 0.759 | 0.927 | 0.857 | 0.911 | 0.869 | 0.910 | 0.869 | 0.885 | 0.865 | 0.800 | 0.833 | 0.945 | 0.909 | 0.974 | 0.972 | 0.950 | 0.941 | 0.896 | 0.973 | 0.853 | 0.944 | 0.881 | 0.900 | 0.881 | 1.000 | 0.977 |
| SVM - linear                  | 0.835 | 0.823 | 0.879 | 0.890 | 0.765 | 0.740 | 0.787 | 0.888 | 0.844 | 0.864 | 0.929 | 0.925 | 0.836 | 0.800 | 0.800 | 0.969 | 0.818 | 0.972 | 0.894 | 0.900 | 0.944 | 0.974 | 0.900 | 0.920 | 0.821 | 0.977 | 0.794 | 1.000 | 0.929 | 0.976 | 0.962 |
| SVM - poly                    | 0.835 | 0.823 | 0.845 | 0.917 | 0.906 | 0.807 | 0.914 | 0.888 | 0.838 | 0.943 | 0.952 | 0.950 | 0.836 | 0.800 | 0.800 | 0.969 | 0.818 | 0.972 | 0.894 | 0.900 | 0.944 | 0.974 | 0.900 | 0.920 | 0.821 | 0.977 | 0.794 | 1.000 | 0.929 | 0.976 | 0.962 |
| SVM - rbf                     | 0.817 | 0.823 | 0.879 | 0.917 | 0.796 | 0.749 | 0.787 | 0.888 | 0.800 | 0.943 | 0.952 | 0.975 | 0.890 | 0.839 | 0.784 | 0.500 | 0.500 | 0.945 | 0.773 | 0.500 | 0.918 | 0.900 | 0.920 | 0.864 | 0.846 | 0.977 | 0.794 | 1.000 | 0.929 | 1.000 | 0.955 |

Results include: Nearest Centroid, Passive Aggressive Classifier and Perceptron.

**Table 4.11 | AUROC score for 30 correlation image feature datasets for cell line MDA-MB-231**

| Classifiers                     | P1    | P2    | P3    | P4    | P5    | P6    | P7    | P8    | P9    | P10   | P11   | P12   | P13   | P14   | P15   | P16   | P17   | P18   | P19   | P20   | P21   | P22   | P23   | P24   | P25   | P26   | P27   | P28   | P29   | P30   |
|---------------------------------|-------|-------|-------|-------|-------|-------|-------|-------|-------|-------|-------|-------|-------|-------|-------|-------|-------|-------|-------|-------|-------|-------|-------|-------|-------|-------|-------|-------|-------|-------|
| AdaBoost                        | 0.757 | 0.583 | 0.535 | 0.728 | 0.801 | 0.466 | 0.839 | 0.589 | 0.853 | 0.757 | 0.565 | 0.890 | 0.820 | 0.863 | 0.466 | 0.664 | 0.897 | 0.691 | 0.833 | 1.000 | 0.835 | 0.770 | 0.750 | 0.598 | 0.745 | 0.863 | 0.826 | 0.731 | 0.717 | 0.730 |
| Bernoulli Naive Bayes           | 0.683 | 0.583 | 0.500 | 0.623 | 0.500 | 0.467 | 0.781 | 0.455 | 0.502 | 0.708 | 0.719 | 0.386 | 0.734 | 0.756 | 0.421 | 0.500 | 0.740 | 0.784 | 0.595 | 0.803 | 0.425 | 0.503 | 0.713 | 0.674 | 0.721 | 0.776 | 0.818 | 0.458 | 0.656 | 0.750 |
| Dummy Classifier                | 0.500 | 0.500 | 0.500 | 0.500 | 0.500 | 0.500 | 0.500 | 0.500 | 0.500 | 0.500 | 0.500 | 0.500 | 0.500 | 0.500 | 0.500 | 0.500 | 0.500 | 0.500 | 0.500 | 0.500 | 0.500 | 0.500 | 0.500 | 0.500 | 0.500 | 0.500 | 0.500 | 0.500 | 0.500 | 0.500 |
| Extra Trees                     | 0.840 | 0.800 | 0.830 | 0.861 | 0.830 | 0.722 | 0.857 | 0.860 | 0.860 | 0.860 | 0.860 | 0.860 | 0.860 | 0.860 | 0.860 | 0.860 | 0.860 | 0.860 | 0.860 | 0.860 | 0.860 | 0.860 | 0.860 | 0.860 | 0.860 | 0.860 | 0.860 | 0.860 | 0.860 | 0.860 |
| Gaussian Naive Bayes            | 0.855 | 0.628 | 0.519 | 0.646 | 0.804 | 0.756 | 0.867 | 0.945 | 0.909 | 0.892 | 0.831 | 0.851 | 0.789 | 0.830 | 0.659 | 0.719 | 0.976 | 0.877 | 0.840 | 0.975 | 0.918 | 0.756 | 0.730 | 0.917 | 0.848 | 0.881 | 0.874 | 0.958 | 0.852 | 0.946 |
| Gradient Boosting               | 0.833 | 0.483 | 0.500 | 0.652 | 0.566 | 0.615 | 0.754 | 0.538 | 0.500 | 0.681 | 0.669 | 0.650 | 0.882 | 0.677 | 0.620 | 0.867 | 0.974 | 0.894 | 0.816 | 0.946 | 0.753 | 0.741 | 0.820 | 0.765 | 0.795 | 0.844 | 0.881 | 0.819 | 0.914 | 0.784 |
| Helium Quantum Classifier       | 0.833 | 0.483 | 0.500 | 0.652 | 0.566 | 0.615 | 0.754 | 0.538 | 0.500 | 0.681 | 0.669 | 0.650 | 0.882 | 0.677 | 0.620 | 0.867 | 0.974 | 0.894 | 0.816 | 0.946 | 0.753 | 0.741 | 0.820 | 0.765 | 0.795 | 0.844 | 0.881 | 0.819 | 0.914 | 0.784 |
| Linear Discriminant Analysis    | 0.833 | 0.483 | 0.500 | 0.652 | 0.566 | 0.615 | 0.754 | 0.538 | 0.500 | 0.681 | 0.669 | 0.650 | 0.882 | 0.677 | 0.620 | 0.867 | 0.974 | 0.894 | 0.816 | 0.946 | 0.753 | 0.741 | 0.820 | 0.765 | 0.795 | 0.844 | 0.881 | 0.819 | 0.914 | 0.784 |
| Logistic Regression             | 0.763 | 0.633 | 0.785 | 0.838 | 0.745 | 0.747 | 0.784 | 0.881 | 0.500 | 0.709 | 0.855 | 0.871 | 0.820 | 0.838 | 0.739 | 0.790 | 0.741 | 0.913 | 0.861 | 1.000 | 0.940 | 0.733 | 0.806 | 0.677 | 0.839 | 0.844 | 0.850 | 0.917 | 0.906 | 0.807 |
| Multi Layer Perceptron          | 0.781 | 0.620 | 0.683 | 0.787 | 0.784 | 0.747 | 0.728 | 0.850 | 0.835 | 0.785 | 0.757 | 0.844 | 0.882 | 0.792 | 0.620 | 0.845 | 0.914 | 0.913 | 0.875 | 0.971 | 0.568 | 0.669 | 0.710 | 0.788 | 0.816 | 0.763 | 0.850 | 0.784 | 0.906 | 0.732 |
| Nearest Neighbors               | 0.681 | 0.502 | 0.583 | 0.816 | 0.673 | 0.512 | 0.822 | 0.692 | 0.742 | 0.811 | 0.690 | 0.787 | 0.882 | 0.713 | 0.540 | 0.736 | 0.882 | 0.848 | 0.787 | 0.971 | 0.568 | 0.669 | 0.710 | 0.788 | 0.816 | 0.763 | 0.850 | 0.784 | 0.906 | 0.732 |
| Quadratic Discriminant Analysis | 0.850 | 0.589 | 0.535 | 0.920 | 0.843 | 0.708 | 0.867 | 0.795 | 0.853 | 0.838 | 0.635 | 0.851 | 0.789 | 0.885 | 0.679 | 0.610 | 0.969 | 0.935 | 0.920 | 1.000 | 0.815 | 0.699 | 0.742 | 0.844 | 0.881 | 0.881 | 0.850 | 0.958 | 0.969 | 0.865 |
| Random Forest                   | 0.750 | 0.502 | 0.500 | 0.652 | 0.500 | 0.591 | 0.782 | 0.538 | 0.500 | 0.690 | 0.605 | 0.748 | 0.442 | 0.500 | 0.710 | 0.828 | 0.500 | 0.853 | 0.547 | 0.689 | 0.800 | 0.653 | 0.817 | 0.744 | 0.850 | 0.850 | 0.500 | 0.500 | 0.730 | 0.730 |
| SVM - linear                    | 0.676 | 0.489 | 0.852 | 0.810 | 0.826 | 0.500 | 0.727 | 0.818 | 0.817 | 0.785 | 0.594 | 0.871 | 0.851 | 0.877 | 0.718 | 0.681 | 0.976 | 0.834 | 0.896 | 0.891 | 0.795 | 0.776 | 0.792 | 0.855 | 0.899 | 0.763 | 0.850 | 0.917 | 0.851 | 0.782 |
| SVM - poly                      | 0.750 | 0.489 | 0.852 | 0.810 | 0.826 | 0.500 | 0.727 | 0.818 | 0.817 | 0.785 | 0.594 | 0.871 | 0.851 | 0.877 | 0.718 | 0.681 | 0.976 | 0.834 | 0.896 | 0.891 | 0.795 | 0.776 | 0.792 | 0.855 | 0.899 | 0.763 | 0.850 | 0.917 | 0.851 | 0.782 |
| SVM - rbf                       | 0.750 | 0.489 | 0.852 | 0.810 | 0.826 | 0.500 | 0.727 | 0.818 | 0.817 | 0.785 | 0.594 | 0.871 | 0.851 | 0.877 | 0.718 | 0.681 | 0.976 | 0.834 | 0.896 | 0.891 | 0.795 | 0.776 | 0.792 | 0.855 | 0.899 | 0.763 | 0.850 | 0.917 | 0.851 | 0.782 |

Results include: Nearest Centroid, Passive Aggressive Classifier and Perceptron.

**Table 4.12 | AUROC score for 30 homogeneity image feature datasets for cell line MDA-MB-231**

| Classifiers           | P1    | P2    | P3    | P4    | P5    | P6    | P7    | P8    | P9    | P10   | P11   | P12   | P13   | P14   | P15   | P16   | P17   | P18   | P19   | P20   | P21   | P22   | P23   | P24   | P25   | P26   | P27   | P28   | P29   | P30   |       |
|-----------------------|-------|-------|-------|-------|-------|-------|-------|-------|-------|-------|-------|-------|-------|-------|-------|-------|-------|-------|-------|-------|-------|-------|-------|-------|-------|-------|-------|-------|-------|-------|-------|
| AdaBoost              | 0.871 | 0.885 | 0.877 | 0.929 | 1.000 | 0.836 | 0.943 | 1.000 | 0.788 | 0.866 | 0.778 | 0.971 | 0.969 | 0.944 | 0.890 | 0.920 | 0.935 | 0.929 | 1.000 | 0.972 | 0.976 | 0.946 | 0.980 | 0.943 | 0.975 | 0.909 | 0.947 | 0.888 | 0.864 | 0.858 |       |
| Bernoulli Naive Bayes | 0.944 | 0.846 | 0.967 | 0.813 | 0.833 | 0.861 | 0.848 | 0.781 | 0.725 | 0.500 | 0.857 | 0.950 | 0.930 | 0.500 | 0.544 | 0.532 | 0.250 | 0.363 | 0.500 | 0.500 | 0.535 | 0.500 | 0.547 | 0.500 | 0.638 | 0.500 | 0.440 | 0.627 | 0.500 | 0.500 |       |
| Dummy Classifier      | 0.500 | 0.500 | 0.500 | 0.500 | 0.500 | 0.500 | 0.500 | 0.500 | 0.500 | 0.500 | 0.500 | 0.500 | 0.500 | 0.500 | 0.500 | 0.500 | 0.500 | 0.500 | 0.500 | 0.500 | 0.500 | 0.500 | 0.500 | 0.500 | 0.500 | 0.500 | 0.500 | 0.500 | 0.500 | 0.500 |       |
| Extra Trees           | 0.833 | 0.500 | 0.500 | 0.543 | 0.799 | 0.806 | 0.856 | 0.740 | 0.500 | 0.388 | 0.907 | 0.971 | 0.897 | 0.877 | 0.887 | 0.900 | 0.909 | 0.944 | 0.500 | 0.864 | 0.500 | 0.896 | 0.875 | 0.679 | 0.604 | 1.000 | 0.890 | 0.974 | 0.932 | 1.000 | 0.938 |
| Gaussian Naive Bayes  | 0.944 | 0.885 | 0.840 | 0.893 | 0.944 | 0.889 | 0.899 | 0.899 | 0.839 | 0.816 | 0.929 | 0.971 | 0.969 | 0.944 | 0.81  |       |       |       |       |       |       |       |       |       |       |       |       |       |       |       |       |



**Table 4.17 | Balanced accuracy score for 30 energy image feature datasets for cell line U87-MG**

| Classifiers                     | P1    | P2    | P3    | P4    | P5    | P6    | P7    | P8    | P9    | P10   | P11   | P12   | P13   | P14   | P15   | P16   | P17   | P18   | P19   | P20   | P21   | P22   | P23   | P24   | P25   | P26   | P27   | P28   | P29   | P30   |       |
|---------------------------------|-------|-------|-------|-------|-------|-------|-------|-------|-------|-------|-------|-------|-------|-------|-------|-------|-------|-------|-------|-------|-------|-------|-------|-------|-------|-------|-------|-------|-------|-------|-------|
| AdaBoost                        | 0.927 | 0.940 | 0.984 | 0.852 | 0.752 | 0.920 | 0.877 | 0.760 | 0.920 | 0.778 | 0.882 | 0.933 | 0.778 | 0.920 | 0.938 | 0.849 | 0.856 | 0.835 | 0.825 | 0.933 | 1.000 | 0.855 | 0.877 | 0.870 | 0.878 | 0.833 | 0.971 | 0.818 | 0.878 | 0.900 | 0.921 |
| Bernoulli Naïve Bayes           | 0.762 | 0.898 | 0.953 | 0.820 | 0.500 | 0.828 | 0.886 | 0.651 | 0.846 | 0.842 | 0.863 | 0.820 | 0.748 | 0.886 | 0.910 | 0.863 | 0.930 | 0.825 | 0.790 | 0.852 | 0.798 | 0.870 | 0.830 | 0.900 | 0.950 | 0.985 | 0.710 | 0.833 | 0.684 | 0.841 |       |
| Decision Tree                   | 0.500 | 0.542 | 0.500 | 0.500 | 0.442 | 0.500 | 0.500 | 0.500 | 0.500 | 0.500 | 0.500 | 0.500 | 0.500 | 0.500 | 0.500 | 0.500 | 0.500 | 0.500 | 0.500 | 0.500 | 0.500 | 0.500 | 0.500 | 0.500 | 0.500 | 0.500 | 0.500 | 0.500 | 0.500 | 0.500 |       |
| Extra Trees                     | 0.944 | 0.940 | 0.984 | 0.852 | 0.752 | 0.920 | 0.877 | 0.760 | 0.920 | 0.778 | 0.882 | 0.933 | 0.778 | 0.920 | 0.938 | 0.849 | 0.856 | 0.835 | 0.825 | 0.933 | 1.000 | 0.855 | 0.877 | 0.870 | 0.878 | 0.833 | 0.971 | 0.818 | 0.878 | 0.900 | 0.921 |
| Gradient Boosting               | 0.871 | 0.940 | 0.984 | 0.852 | 0.752 | 0.920 | 0.877 | 0.760 | 0.920 | 0.778 | 0.882 | 0.933 | 0.778 | 0.920 | 0.938 | 0.849 | 0.856 | 0.835 | 0.825 | 0.933 | 1.000 | 0.855 | 0.877 | 0.870 | 0.878 | 0.833 | 0.971 | 0.818 | 0.878 | 0.900 | 0.921 |
| Heuristic Quantum Classifier    | 0.889 | 0.898 | 0.984 | 0.852 | 0.752 | 0.920 | 0.877 | 0.760 | 0.920 | 0.778 | 0.882 | 0.933 | 0.778 | 0.920 | 0.938 | 0.849 | 0.856 | 0.835 | 0.825 | 0.933 | 1.000 | 0.855 | 0.877 | 0.870 | 0.878 | 0.833 | 0.971 | 0.818 | 0.878 | 0.900 | 0.921 |
| Linear Discriminant Analysis    | 0.927 | 0.948 | 0.984 | 0.852 | 0.752 | 0.920 | 0.877 | 0.760 | 0.920 | 0.778 | 0.882 | 0.933 | 0.778 | 0.920 | 0.938 | 0.849 | 0.856 | 0.835 | 0.825 | 0.933 | 1.000 | 0.855 | 0.877 | 0.870 | 0.878 | 0.833 | 0.971 | 0.818 | 0.878 | 0.900 | 0.921 |
| Logistic Regression             | 0.944 | 0.948 | 0.984 | 0.852 | 0.752 | 0.920 | 0.877 | 0.760 | 0.920 | 0.778 | 0.882 | 0.933 | 0.778 | 0.920 | 0.938 | 0.849 | 0.856 | 0.835 | 0.825 | 0.933 | 1.000 | 0.855 | 0.877 | 0.870 | 0.878 | 0.833 | 0.971 | 0.818 | 0.878 | 0.900 | 0.921 |
| Multi Layer Perceptron          | 0.946 | 0.940 | 0.922 | 0.871 | 0.818 | 0.851 | 0.935 | 0.819 | 0.920 | 0.842 | 0.863 | 0.855 | 0.835 | 0.817 | 0.881 | 0.880 | 0.800 | 0.790 | 0.925 | 0.808 | 0.988 | 0.897 | 0.813 | 0.944 | 0.822 | 0.971 | 0.844 | 0.822 | 0.984 | 0.941 |       |
| Nearest Neighbors               | 0.944 | 0.938 | 1.000 | 0.875 | 0.710 | 0.920 | 0.911 | 0.891 | 1.000 | 0.827 | 0.844 | 0.955 | 0.814 | 0.922 | 0.838 | 0.871 | 0.922 | 0.838 | 0.871 | 0.925 | 0.808 | 0.988 | 0.897 | 0.813 | 0.944 | 0.822 | 0.971 | 0.844 | 0.822 | 0.984 | 0.941 |
| Passive Aggressive Classifier   | 0.944 | 0.940 | 0.922 | 0.871 | 0.818 | 0.851 | 0.935 | 0.819 | 0.920 | 0.842 | 0.863 | 0.855 | 0.835 | 0.817 | 0.881 | 0.880 | 0.800 | 0.790 | 0.925 | 0.808 | 0.988 | 0.897 | 0.813 | 0.944 | 0.822 | 0.971 | 0.844 | 0.822 | 0.984 | 0.941 |       |
| Random Forest                   | 0.944 | 0.940 | 0.922 | 0.871 | 0.818 | 0.851 | 0.935 | 0.819 | 0.920 | 0.842 | 0.863 | 0.855 | 0.835 | 0.817 | 0.881 | 0.880 | 0.800 | 0.790 | 0.925 | 0.808 | 0.988 | 0.897 | 0.813 | 0.944 | 0.822 | 0.971 | 0.844 | 0.822 | 0.984 | 0.941 |       |
| Support Vector Machine          | 0.944 | 0.940 | 0.922 | 0.871 | 0.818 | 0.851 | 0.935 | 0.819 | 0.920 | 0.842 | 0.863 | 0.855 | 0.835 | 0.817 | 0.881 | 0.880 | 0.800 | 0.790 | 0.925 | 0.808 | 0.988 | 0.897 | 0.813 | 0.944 | 0.822 | 0.971 | 0.844 | 0.822 | 0.984 | 0.941 |       |
| Weighted Majority Classifier    | 0.864 | 0.940 | 0.922 | 0.871 | 0.818 | 0.851 | 0.935 | 0.819 | 0.920 | 0.842 | 0.863 | 0.855 | 0.835 | 0.817 | 0.881 | 0.880 | 0.800 | 0.790 | 0.925 | 0.808 | 0.988 | 0.897 | 0.813 | 0.944 | 0.822 | 0.971 | 0.844 | 0.822 | 0.984 | 0.941 |       |
| Quadratic Discriminant Analysis | 0.889 | 0.898 | 0.984 | 0.852 | 0.752 | 0.920 | 0.877 | 0.760 | 0.920 | 0.778 | 0.882 | 0.933 | 0.778 | 0.920 | 0.938 | 0.849 | 0.856 | 0.835 | 0.825 | 0.933 | 1.000 | 0.855 | 0.877 | 0.870 | 0.878 | 0.833 | 0.971 | 0.818 | 0.878 | 0.900 | 0.921 |
| Random Forest                   | 0.944 | 0.940 | 0.922 | 0.871 | 0.818 | 0.851 | 0.935 | 0.819 | 0.920 | 0.842 | 0.863 | 0.855 | 0.835 | 0.817 | 0.881 | 0.880 | 0.800 | 0.790 | 0.925 | 0.808 | 0.988 | 0.897 | 0.813 | 0.944 | 0.822 | 0.971 | 0.844 | 0.822 | 0.984 | 0.941 |       |
| SVM - linear                    | 0.927 | 0.960 | 0.984 | 0.852 | 0.752 | 0.920 | 0.877 | 0.760 | 0.920 | 0.778 | 0.882 | 0.933 | 0.778 | 0.920 | 0.938 | 0.849 | 0.856 | 0.835 | 0.825 | 0.933 | 1.000 | 0.855 | 0.877 | 0.870 | 0.878 | 0.833 | 0.971 | 0.818 | 0.878 | 0.900 | 0.921 |
| SVM - poly                      | 0.927 | 0.938 | 0.984 | 0.852 | 0.752 | 0.920 | 0.877 | 0.760 | 0.920 | 0.778 | 0.882 | 0.933 | 0.778 | 0.920 | 0.938 | 0.849 | 0.856 | 0.835 | 0.825 | 0.933 | 1.000 | 0.855 | 0.877 | 0.870 | 0.878 | 0.833 | 0.971 | 0.818 | 0.878 | 0.900 | 0.921 |
| SVM - rbf                       | 0.927 | 0.960 | 0.984 | 0.852 | 0.752 | 0.920 | 0.877 | 0.760 | 0.920 | 0.778 | 0.882 | 0.933 | 0.778 | 0.920 | 0.938 | 0.849 | 0.856 | 0.835 | 0.825 | 0.933 | 1.000 | 0.855 | 0.877 | 0.870 | 0.878 | 0.833 | 0.971 | 0.818 | 0.878 | 0.900 | 0.921 |

**Table 4.18 | Balanced accuracy score for 30 homogeneity image feature datasets for cell line U87-MG**

| Classifiers                   | P1    | P2    | P3    | P4    | P5    | P6    | P7    | P8    | P9    | P10   | P11   | P12   | P13   | P14   | P15   | P16   | P17   | P18   | P19   | P20   | P21   | P22   | P23   | P24   | P25   | P26   | P27   | P28   | P29   | P30   |
|-------------------------------|-------|-------|-------|-------|-------|-------|-------|-------|-------|-------|-------|-------|-------|-------|-------|-------|-------|-------|-------|-------|-------|-------|-------|-------|-------|-------|-------|-------|-------|-------|
| AdaBoost                      | 0.931 | 0.970 | 0.969 | 0.858 | 0.653 | 1.000 | 0.881 | 0.920 | 0.778 | 0.842 | 0.855 | 0.921 | 0.837 | 0.878 | 0.859 | 0.979 | 0.946 | 0.811 | 0.876 | 0.955 | 0.929 | 0.865 | 0.897 | 0.876 | 0.799 | 0.938 | 1.000 | 0.864 | 1.000 | 0.895 |
| Bernoulli Naïve Bayes         | 0.931 | 0.970 | 0.952 | 0.744 | 0.789 | 1.000 | 0.962 | 0.869 | 0.935 | 0.826 | 0.838 | 0.871 | 0.854 | 0.833 | 0.897 | 0.896 | 0.946 | 0.810 | 0.876 | 0.942 | 0.927 | 0.893 | 0.904 | 0.757 | 0.715 | 0.886 | 0.918 | 0.840 | 0.611 | 0.816 |
| Decision Tree                 | 0.500 | 0.533 | 0.500 | 0.500 | 0.500 | 0.500 | 0.500 | 0.500 | 0.500 | 0.500 | 0.500 | 0.500 | 0.500 | 0.500 | 0.500 | 0.500 | 0.500 | 0.500 | 0.500 | 0.500 | 0.500 | 0.500 | 0.500 | 0.500 | 0.500 | 0.500 | 0.500 | 0.500 | 0.500 | 0.500 |
| Extra Trees                   | 0.931 | 0.970 | 0.952 | 0.744 | 0.789 | 1.000 | 0.962 | 0.869 | 0.935 | 0.826 | 0.838 | 0.871 | 0.854 | 0.833 | 0.897 | 0.896 | 0.946 | 0.810 | 0.876 | 0.942 | 0.927 | 0.893 | 0.904 | 0.757 | 0.715 | 0.886 | 0.918 | 0.840 | 0.611 | 0.816 |
| Gradient Boosting             | 0.931 | 0.970 | 0.952 | 0.744 | 0.789 | 1.000 | 0.962 | 0.869 | 0.935 | 0.826 | 0.838 | 0.871 | 0.854 | 0.833 | 0.897 | 0.896 | 0.946 | 0.810 | 0.876 | 0.942 | 0.927 | 0.893 | 0.904 | 0.757 | 0.715 | 0.886 | 0.918 | 0.840 | 0.611 | 0.816 |
| Heuristic Quantum Classifier  | 0.931 | 0.970 | 0.952 | 0.744 | 0.789 | 1.000 | 0.962 | 0.869 | 0.935 | 0.826 | 0.838 | 0.871 | 0.854 | 0.833 | 0.897 | 0.896 | 0.946 | 0.810 | 0.876 | 0.942 | 0.927 | 0.893 | 0.904 | 0.757 | 0.715 | 0.886 | 0.918 | 0.840 | 0.611 | 0.816 |
| Linear Discriminant Analysis  | 0.931 | 0.970 | 0.952 | 0.744 | 0.789 | 1.000 | 0.962 | 0.869 | 0.935 | 0.826 | 0.838 | 0.871 | 0.854 | 0.833 | 0.897 | 0.896 | 0.946 | 0.810 | 0.876 | 0.942 | 0.927 | 0.893 | 0.904 | 0.757 | 0.715 | 0.886 | 0.918 | 0.840 | 0.611 | 0.816 |
| Logistic Regression           | 0.931 | 0.970 | 0.952 | 0.744 | 0.789 | 1.000 | 0.962 | 0.869 | 0.935 | 0.826 | 0.838 | 0.871 | 0.854 | 0.833 | 0.897 | 0.896 | 0.946 | 0.810 | 0.876 | 0.942 | 0.927 | 0.893 | 0.904 | 0.757 | 0.715 | 0.886 | 0.918 | 0.840 | 0.611 | 0.816 |
| Multi Layer Perceptron        | 0.931 | 0.970 | 0.952 | 0.744 | 0.789 | 1.000 | 0.962 | 0.869 | 0.935 | 0.826 | 0.838 | 0.871 | 0.854 | 0.833 | 0.897 | 0.896 | 0.946 | 0.810 | 0.876 | 0.942 | 0.927 | 0.893 | 0.904 | 0.757 | 0.715 | 0.886 | 0.918 | 0.840 | 0.611 | 0.816 |
| Nearest Neighbors             | 0.931 | 0.970 | 0.952 | 0.744 | 0.789 | 1.000 | 0.962 | 0.869 | 0.935 | 0.826 | 0.838 | 0.871 | 0.854 | 0.833 | 0.897 | 0.896 | 0.946 | 0.810 | 0.876 | 0.942 | 0.927 | 0.893 | 0.904 | 0.757 | 0.715 | 0.886 | 0.918 | 0.840 | 0.611 | 0.816 |
| Passive Aggressive Classifier | 0.931 | 0.970 | 0.952 | 0.744 | 0.789 | 1.000 | 0.962 | 0.869 | 0.935 | 0.826 | 0.838 | 0.871 | 0.854 | 0.833 | 0.897 | 0.896 | 0.946 | 0.810 | 0.876 | 0.942 | 0.927 | 0.893 | 0.904 | 0.757 | 0.715 | 0.886 | 0.918 | 0.840 | 0.611 | 0.816 |
| Random Forest                 | 0.931 | 0.970 | 0.952 | 0.744 | 0.789 | 1.000 | 0.962 | 0.869 | 0.935 | 0.826 | 0.838 | 0.871 | 0.854 | 0.833 | 0.897 | 0.896 | 0.946 | 0.810 | 0.876 | 0.942 | 0.927 | 0.893 | 0.904 | 0.757 | 0.715 | 0.886 | 0.918 | 0.840 | 0.611 | 0.816 |
| SVM - linear                  | 0.931 | 0.970 | 0.952 | 0.744 | 0.789 | 1.000 | 0.962 | 0.869 | 0.935 | 0.826 | 0.838 | 0.871 | 0.854 | 0.833 | 0.897 | 0.896 | 0.946 | 0.810 | 0.876 | 0.942 | 0.927 | 0.893 | 0.904 | 0.757 | 0.715 | 0.886 | 0.918 | 0.840 | 0.611 | 0.816 |
| SVM - poly                    | 0.931 | 0.970 | 0.952 | 0.744 | 0.789 | 1.000 | 0.962 | 0.869 | 0.935 | 0.826 | 0.838 | 0.871 | 0.854 | 0.833 | 0.897 | 0.896 | 0.946 | 0.810 | 0.876 | 0.942 | 0.927 | 0.893 | 0.904 | 0.757 | 0.715 | 0.886 | 0.918 | 0.840 | 0.611 | 0.816 |
| SVM - rbf                     | 0.931 | 0.970 | 0.952 | 0.744 | 0.789 | 1.000 | 0.962 | 0.869 | 0.935 | 0.826 | 0.838 | 0.871 | 0.854 | 0.833 | 0.897 | 0.896 | 0.946 | 0.810 | 0.876 | 0.942 | 0.927 | 0.893 | 0.904 | 0.757 | 0.715 | 0.886 | 0.918 | 0.840 | 0.611 | 0.816 |

**Table 4.19 | AUROC score for 30 RGB image feature datasets for cell line U87-MG**

| Classifiers           | P1    | P2    | P3    | P4    | P5    | P6    | P7    | P8    | P9    | P10   | P11   | P12   | P13   | P14   | P15   | P16   | P17   | P18   | P19   | P20   | P21   | P22   | P23   | P24   | P25   | P26   | P27   | P28   | P29   | P30   |
|-----------------------|-------|-------|-------|-------|-------|-------|-------|-------|-------|-------|-------|-------|-------|-------|-------|-------|-------|-------|-------|-------|-------|-------|-------|-------|-------|-------|-------|-------|-------|-------|
| AdaBoost              | 0.863 | 0.920 | 0.833 | 0.731 | 0.752 | 0.806 | 0.773 | 0.844 | 0.890 | 0.693 | 0.916 | 0.777 | 0.721 | 0.854 | 0.733 | 0.979 | 0.522 | 0.633 | 0.875 | 0.799 | 0.708 | 0.868 | 0.900 | 0.784 | 0.700 | 0.484 | 0.807 | 0.813 | 0.649 | 0.897 |
| Bernoulli Naïve Bayes | 0.907 | 0.772 | 0.773 | 0.833 | 0.636 | 0.780 | 0.693 | 0.916 | 0.827 | 0.590 | 0.935 | 0.763 | 0.788 | 0.709 | 0.793 | 0.885 | 0.407 | 0.713 | 0.855 | 0.755 | 0.733 | 0.762 | 0.855 |       |       |       |       |       |       |       |







Table 4.33 | AUROC score for 30 contrast image feature datasets for cell line MCF7

| Classifiers                  | P1    | P2    | P3    | P4    | P5    | P6    | P7    | P8    | P9    | P10   | P11   | P12   | P13   | P14   | P15   | P16   | P17   | P18   | P19   | P20   | P21   | P22   | P23   | P24   | P25   | P26   | P27   | P28   | P29   | P30   |       |       |       |
|------------------------------|-------|-------|-------|-------|-------|-------|-------|-------|-------|-------|-------|-------|-------|-------|-------|-------|-------|-------|-------|-------|-------|-------|-------|-------|-------|-------|-------|-------|-------|-------|-------|-------|-------|
| AdaBoost                     | 0.834 | 0.881 | 0.800 | 0.864 | 0.677 | 0.718 | 0.897 | 0.826 | 0.857 | 0.724 | 0.811 | 0.806 | 0.671 | 0.795 | 0.733 | 0.704 | 0.469 | 0.832 | 0.690 | 0.705 | 0.864 | 0.724 | 0.831 | 0.469 | 0.844 | 0.500 | 0.626 | 0.686 | 0.722 | 0.820 | 0.891 | 0.881 | 0.906 |
| Bernoulli Naive Bayes        | 0.762 | 0.890 | 0.864 | 0.696 | 0.719 | 0.835 | 0.853 | 0.855 | 0.722 | 0.706 | 0.699 | 0.745 | 0.665 | 0.650 | 0.521 | 0.569 | 0.741 | 0.423 | 0.730 | 0.614 | 0.500 | 0.844 | 0.500 | 0.813 | 0.500 | 0.715 | 0.786 | 0.744 | 0.807 | 0.874 | 0.807 | 0.822 | 0.862 |
| Dummy Classifier             | 0.500 | 0.500 | 0.500 | 0.500 | 0.500 | 0.500 | 0.500 | 0.500 | 0.500 | 0.500 | 0.500 | 0.500 | 0.500 | 0.500 | 0.500 | 0.500 | 0.500 | 0.500 | 0.500 | 0.500 | 0.500 | 0.500 | 0.500 | 0.500 | 0.500 | 0.500 | 0.500 | 0.500 | 0.500 | 0.500 | 0.500 | 0.500 |       |
| Extra Trees                  | 0.500 | 0.500 | 0.500 | 0.500 | 0.500 | 0.500 | 0.500 | 0.500 | 0.500 | 0.500 | 0.500 | 0.500 | 0.500 | 0.500 | 0.500 | 0.500 | 0.500 | 0.500 | 0.500 | 0.500 | 0.500 | 0.500 | 0.500 | 0.500 | 0.500 | 0.500 | 0.500 | 0.500 | 0.500 | 0.500 | 0.500 | 0.500 |       |
| Gaussian Naive Bayes         | 0.778 | 0.799 | 0.760 | 0.688 | 0.627 | 0.760 | 0.750 | 0.611 | 0.632 | 0.542 | 0.612 | 0.591 | 0.565 | 0.686 | 0.500 | 0.598 | 0.500 | 0.598 | 0.500 | 0.532 | 0.417 | 0.750 | 0.384 | 0.610 | 0.538 | 0.776 | 0.722 | 0.621 | 0.684 | 0.881 | 0.684 | 0.838 | 0.838 |
| Gradient Boosting            | 0.792 | 1.000 | 0.891 | 0.620 | 0.700 | 0.897 | 0.871 | 0.898 | 0.500 | 0.500 | 0.691 | 0.861 | 0.724 | 0.775 | 0.784 | 0.833 | 0.627 | 0.675 | 0.890 | 0.525 | 0.417 | 0.750 | 0.384 | 0.610 | 0.538 | 0.776 | 0.722 | 0.621 | 0.684 | 0.881 | 0.684 | 0.838 | 0.838 |
| Helstrom Quantum Classifier  | 0.820 | 0.981 | 0.871 | 0.694 | 0.699 | 0.857 | 0.891 | 0.917 | 0.722 | 0.759 | 0.848 | 0.861 | 0.627 | 0.757 | 0.686 | 0.584 | 0.897 | 0.445 | 0.595 | 0.725 | 0.750 | 0.722 | 0.650 | 0.609 | 0.807 | 0.610 | 0.715 | 0.786 | 0.698 | 0.798 | 0.731 | 0.744 | 0.744 |
| Linear Discriminant Analysis | 0.756 | 0.708 | 0.651 | 0.707 | 0.588 | 0.627 | 0.706 | 0.792 | 0.611 | 0.550 | 0.642 | 0.612 | 0.591 | 0.565 | 0.500 | 0.442 | 0.735 | 0.531 | 0.526 | 0.750 | 0.484 | 0.631 | 0.483 | 0.588 | 0.776 | 0.760 | 0.731 | 0.759 | 0.711 | 0.569 | 0.731 | 0.569 | 0.731 |
| Logistic Regression          | 0.820 | 0.981 | 0.871 | 0.694 | 0.699 | 0.857 | 0.891 | 0.917 | 0.722 | 0.759 | 0.848 | 0.861 | 0.627 | 0.757 | 0.686 | 0.584 | 0.897 | 0.445 | 0.595 | 0.725 | 0.750 | 0.722 | 0.650 | 0.609 | 0.807 | 0.610 | 0.715 | 0.786 | 0.698 | 0.798 | 0.731 | 0.744 | 0.744 |
| Multi Layer Perceptron       | 0.756 | 0.708 | 0.651 | 0.707 | 0.588 | 0.627 | 0.706 | 0.792 | 0.611 | 0.550 | 0.642 | 0.612 | 0.591 | 0.565 | 0.500 | 0.442 | 0.735 | 0.531 | 0.526 | 0.750 | 0.484 | 0.631 | 0.483 | 0.588 | 0.776 | 0.760 | 0.731 | 0.759 | 0.711 | 0.569 | 0.731 | 0.569 | 0.731 |
| Nearest-Neighbors            | 0.820 | 0.981 | 0.871 | 0.694 | 0.699 | 0.857 | 0.891 | 0.917 | 0.722 | 0.759 | 0.848 | 0.861 | 0.627 | 0.757 | 0.686 | 0.584 | 0.897 | 0.445 | 0.595 | 0.725 | 0.750 | 0.722 | 0.650 | 0.609 | 0.807 | 0.610 | 0.715 | 0.786 | 0.698 | 0.798 | 0.731 | 0.744 | 0.744 |
| Nearest-Neighbors            | 0.820 | 0.981 | 0.871 | 0.694 | 0.699 | 0.857 | 0.891 | 0.917 | 0.722 | 0.759 | 0.848 | 0.861 | 0.627 | 0.757 | 0.686 | 0.584 | 0.897 | 0.445 | 0.595 | 0.725 | 0.750 | 0.722 | 0.650 | 0.609 | 0.807 | 0.610 | 0.715 | 0.786 | 0.698 | 0.798 | 0.731 | 0.744 | 0.744 |
| Nearest-Neighbors            | 0.820 | 0.981 | 0.871 | 0.694 | 0.699 | 0.857 | 0.891 | 0.917 | 0.722 | 0.759 | 0.848 | 0.861 | 0.627 | 0.757 | 0.686 | 0.584 | 0.897 | 0.445 | 0.595 | 0.725 | 0.750 | 0.722 | 0.650 | 0.609 | 0.807 | 0.610 | 0.715 | 0.786 | 0.698 | 0.798 | 0.731 | 0.744 | 0.744 |
| Nearest-Neighbors            | 0.820 | 0.981 | 0.871 | 0.694 | 0.699 | 0.857 | 0.891 | 0.917 | 0.722 | 0.759 | 0.848 | 0.861 | 0.627 | 0.757 | 0.686 | 0.584 | 0.897 | 0.445 | 0.595 | 0.725 | 0.750 | 0.722 | 0.650 | 0.609 | 0.807 | 0.610 | 0.715 | 0.786 | 0.698 | 0.798 | 0.731 | 0.744 | 0.744 |
| Nearest-Neighbors            | 0.820 | 0.981 | 0.871 | 0.694 | 0.699 | 0.857 | 0.891 | 0.917 | 0.722 | 0.759 | 0.848 | 0.861 | 0.627 | 0.757 | 0.686 | 0.584 | 0.897 | 0.445 | 0.595 | 0.725 | 0.750 | 0.722 | 0.650 | 0.609 | 0.807 | 0.610 | 0.715 | 0.786 | 0.698 | 0.798 | 0.731 | 0.744 | 0.744 |
| Nearest-Neighbors            | 0.820 | 0.981 | 0.871 | 0.694 | 0.699 | 0.857 | 0.891 | 0.917 | 0.722 | 0.759 | 0.848 | 0.861 | 0.627 | 0.757 | 0.686 | 0.584 | 0.897 | 0.445 | 0.595 | 0.725 | 0.750 | 0.722 | 0.650 | 0.609 | 0.807 | 0.610 | 0.715 | 0.786 | 0.698 | 0.798 | 0.731 | 0.744 | 0.744 |
| Nearest-Neighbors            | 0.820 | 0.981 | 0.871 | 0.694 | 0.699 | 0.857 | 0.891 | 0.917 | 0.722 | 0.759 | 0.848 | 0.861 | 0.627 | 0.757 | 0.686 | 0.584 | 0.897 | 0.445 | 0.595 | 0.725 | 0.750 | 0.722 | 0.650 | 0.609 | 0.807 | 0.610 | 0.715 | 0.786 | 0.698 | 0.798 | 0.731 | 0.744 | 0.744 |
| Nearest-Neighbors            | 0.820 | 0.981 | 0.871 | 0.694 | 0.699 | 0.857 | 0.891 | 0.917 | 0.722 | 0.759 | 0.848 | 0.861 | 0.627 | 0.757 | 0.686 | 0.584 | 0.897 | 0.445 | 0.595 | 0.725 | 0.750 | 0.722 | 0.650 | 0.609 | 0.807 | 0.610 | 0.715 | 0.786 | 0.698 | 0.798 | 0.731 | 0.744 | 0.744 |
| Nearest-Neighbors            | 0.820 | 0.981 | 0.871 | 0.694 | 0.699 | 0.857 | 0.891 | 0.917 | 0.722 | 0.759 | 0.848 | 0.861 | 0.627 | 0.757 | 0.686 | 0.584 | 0.897 | 0.445 | 0.595 | 0.725 | 0.750 | 0.722 | 0.650 | 0.609 | 0.807 | 0.610 | 0.715 | 0.786 | 0.698 | 0.798 | 0.731 | 0.744 | 0.744 |
| Nearest-Neighbors            | 0.820 | 0.981 | 0.871 | 0.694 | 0.699 | 0.857 | 0.891 | 0.917 | 0.722 | 0.759 | 0.848 | 0.861 | 0.627 | 0.757 | 0.686 | 0.584 | 0.897 | 0.445 | 0.595 | 0.725 | 0.750 | 0.722 | 0.650 | 0.609 | 0.807 | 0.610 | 0.715 | 0.786 | 0.698 | 0.798 | 0.731 | 0.744 | 0.744 |
| Nearest-Neighbors            | 0.820 | 0.981 | 0.871 | 0.694 | 0.699 | 0.857 | 0.891 | 0.917 | 0.722 | 0.759 | 0.848 | 0.861 | 0.627 | 0.757 | 0.686 | 0.584 | 0.897 | 0.445 | 0.595 | 0.725 | 0.750 | 0.722 | 0.650 | 0.609 | 0.807 | 0.610 | 0.715 | 0.786 | 0.698 | 0.798 | 0.731 | 0.744 | 0.744 |
| Nearest-Neighbors            | 0.820 | 0.981 | 0.871 | 0.694 | 0.699 | 0.857 | 0.891 | 0.917 | 0.722 | 0.759 | 0.848 | 0.861 | 0.627 | 0.757 | 0.686 | 0.584 | 0.897 | 0.445 | 0.595 | 0.725 | 0.750 | 0.722 | 0.650 | 0.609 | 0.807 | 0.610 | 0.715 | 0.786 | 0.698 | 0.798 | 0.731 | 0.744 | 0.744 |
| Nearest-Neighbors            | 0.820 | 0.981 | 0.871 | 0.694 | 0.699 | 0.857 | 0.891 | 0.917 | 0.722 | 0.759 | 0.848 | 0.861 | 0.627 | 0.757 | 0.686 | 0.584 | 0.897 | 0.445 | 0.595 | 0.725 | 0.750 | 0.722 | 0.650 | 0.609 | 0.807 | 0.610 | 0.715 | 0.786 | 0.698 | 0.798 | 0.731 | 0.744 | 0.744 |
| Nearest-Neighbors            | 0.820 | 0.981 | 0.871 | 0.694 | 0.699 | 0.857 | 0.891 | 0.917 | 0.722 | 0.759 | 0.848 | 0.861 | 0.627 | 0.757 | 0.686 | 0.584 | 0.897 | 0.445 | 0.595 | 0.725 | 0.750 | 0.722 | 0.650 | 0.609 | 0.807 | 0.610 | 0.715 | 0.786 | 0.698 | 0.798 | 0.731 | 0.744 | 0.744 |
| Nearest-Neighbors            | 0.820 | 0.981 | 0.871 | 0.694 | 0.699 | 0.857 | 0.891 | 0.917 | 0.722 | 0.759 | 0.848 | 0.861 | 0.627 | 0.757 | 0.686 | 0.584 | 0.897 | 0.445 | 0.595 | 0.725 | 0.750 | 0.722 | 0.650 | 0.609 | 0.807 | 0.610 | 0.715 | 0.786 | 0.698 | 0.798 | 0.731 | 0.744 | 0.744 |
| Nearest-Neighbors            | 0.820 | 0.981 | 0.871 | 0.694 | 0.699 | 0.857 | 0.891 | 0.917 | 0.722 | 0.759 | 0.848 | 0.861 | 0.627 | 0.757 | 0.686 | 0.584 | 0.897 | 0.445 | 0.595 | 0.725 | 0.750 | 0.722 | 0.650 | 0.609 | 0.807 | 0.610 | 0.715 | 0.786 | 0.698 | 0.798 | 0.731 | 0.744 | 0.744 |
| Nearest-Neighbors            | 0.820 | 0.981 | 0.871 | 0.694 | 0.699 | 0.857 | 0.891 | 0.917 | 0.722 | 0.759 | 0.848 | 0.861 | 0.627 | 0.757 | 0.686 | 0.584 | 0.897 | 0.445 | 0.595 | 0.725 | 0.750 | 0.722 | 0.650 | 0.609 | 0.807 | 0.610 | 0.715 | 0.786 | 0.698 | 0.798 | 0.731 | 0.744 | 0.744 |
| Nearest-Neighbors            | 0.820 | 0.981 | 0.871 | 0.694 | 0.699 | 0.857 | 0.891 | 0.917 | 0.722 | 0.759 | 0.848 | 0.861 | 0.627 | 0.757 | 0.686 | 0.584 | 0.897 | 0.445 | 0.595 | 0.725 | 0.750 | 0.722 | 0.650 | 0.609 | 0.807 | 0.610 | 0.715 | 0.786 | 0.698 | 0.798 | 0.731 | 0.744 | 0.744 |
| Nearest-Neighbors            | 0.820 | 0.981 | 0.871 | 0.694 | 0.699 | 0.857 | 0.891 | 0.917 | 0.722 | 0.759 | 0.848 | 0.861 | 0.627 | 0.757 | 0.686 | 0.584 | 0.897 | 0.445 | 0.595 | 0.725 | 0.750 | 0.722 | 0.650 | 0.609 | 0.807 | 0.610 | 0.715 | 0.786 | 0.698 | 0.798 | 0.731 | 0.744 | 0.744 |
| Nearest-Neighbors            | 0.820 | 0.981 | 0.871 | 0.694 | 0.699 | 0.857 | 0.891 | 0.917 | 0.722 | 0.759 | 0.848 | 0.861 | 0.627 | 0.757 | 0.686 | 0.584 | 0.897 | 0.445 | 0.595 | 0.725 | 0.750 | 0.722 | 0.650 | 0.609 | 0.807 | 0.610 | 0.715 | 0.786 | 0.698 | 0.798 | 0.731 | 0.744 | 0.744 |
| Nearest-Neighbors            | 0.820 | 0.981 | 0.871 | 0.694 | 0.699 | 0.857 | 0.891 | 0.917 | 0.722 | 0.759 | 0.848 | 0.861 | 0.627 | 0.757 | 0.686 | 0.584 | 0.897 | 0.445 | 0.595 | 0.725 | 0.750 | 0.722 | 0.650 | 0.609 | 0.807 | 0.610 | 0.715 | 0.786 | 0.698 | 0.798 | 0.731 | 0.744 | 0.744 |
| Nearest-Neighbors            | 0.820 | 0.981 | 0.871 | 0.694 | 0.699 | 0.857 | 0.891 | 0.917 | 0.722 | 0.759 | 0.848 | 0.861 | 0.627 | 0.757 | 0.686 | 0.584 | 0.897 | 0.445 | 0.595 | 0.725 | 0.750 | 0.722 | 0.650 | 0.609 |       |       |       |       |       |       |       |       |       |





Table 4.41 | Balanced accuracy score for 30 energy image feature datasets for cell line U251

| Classifiers                     | P1    | P2    | P3    | P4    | P5    | P6    | P7    | P8    | P9    | P10   | P11   | P12   | P13   | P14   | P15   | P16   | P17   | P18   | P19   | P20   | P21   | P22   | P23   | P24   | P25   | P26   | P27   | P28   | P29   | P30   |
|---------------------------------|-------|-------|-------|-------|-------|-------|-------|-------|-------|-------|-------|-------|-------|-------|-------|-------|-------|-------|-------|-------|-------|-------|-------|-------|-------|-------|-------|-------|-------|-------|
| AdaBoost                        | 1.000 | 1.000 | 1.000 | 0.981 | 0.987 | 1.000 | 0.974 | 1.000 | 0.975 | 1.000 | 0.952 | 0.955 | 0.982 | 0.922 | 0.958 | 0.927 | 0.946 | 0.978 | 0.931 | 0.974 | 1.000 | 0.931 | 0.947 | 1.000 | 0.983 | 1.000 | 0.983 | 1.000 | 0.984 | 0.982 |
| Bernoulli Naive Bayes           | 0.940 | 0.912 | 0.838 | 0.827 | 0.955 | 0.984 | 0.922 | 0.933 | 0.885 | 0.971 | 0.941 | 0.807 | 0.500 | 0.500 | 0.500 | 0.887 | 0.920 | 0.887 | 0.920 | 0.887 | 0.920 | 0.887 | 0.920 | 0.887 | 0.920 | 0.887 | 0.920 | 0.887 | 0.920 | 0.887 |
| Decision Tree                   | 0.988 | 0.988 | 0.988 | 0.988 | 0.988 | 0.988 | 0.988 | 0.988 | 0.988 | 0.988 | 0.988 | 0.988 | 0.988 | 0.988 | 0.988 | 0.988 | 0.988 | 0.988 | 0.988 | 0.988 | 0.988 | 0.988 | 0.988 | 0.988 | 0.988 | 0.988 | 0.988 | 0.988 | 0.988 | 0.988 |
| Extra Trees                     | 0.933 | 0.500 | 0.859 | 0.500 | 0.494 | 0.500 | 0.484 | 0.500 | 0.500 | 0.500 | 0.500 | 0.500 | 0.500 | 0.500 | 0.500 | 0.500 | 0.500 | 0.500 | 0.500 | 0.500 | 0.500 | 0.500 | 0.500 | 0.500 | 0.500 | 0.500 | 0.500 | 0.500 | 0.500 |       |
| Gaussian Naive Bayes            | 0.917 | 1.000 | 1.000 | 1.000 | 0.944 | 1.000 | 0.944 | 1.000 | 1.000 | 1.000 | 0.944 | 1.000 | 0.944 | 1.000 | 0.944 | 1.000 | 0.944 | 1.000 | 0.944 | 1.000 | 0.944 | 1.000 | 0.944 | 1.000 | 0.944 | 1.000 | 0.944 | 1.000 | 0.944 |       |
| Gradient Boosting               | 1.000 | 1.000 | 1.000 | 1.000 | 0.933 | 1.000 | 0.974 | 1.000 | 1.000 | 1.000 | 0.933 | 1.000 | 0.974 | 1.000 | 1.000 | 0.933 | 1.000 | 0.974 | 1.000 | 1.000 | 0.933 | 1.000 | 0.974 | 1.000 | 1.000 | 0.933 | 1.000 | 0.974 | 1.000 |       |
| Helstrom Quantum Classifier     | 0.960 | 1.000 | 1.000 | 1.000 | 1.000 | 0.974 | 1.000 | 0.967 | 0.981 | 0.971 | 0.941 | 0.983 | 0.976 | 0.967 | 0.941 | 0.960 | 0.958 | 0.927 | 0.946 | 0.978 | 0.931 | 0.918 | 1.000 | 0.958 | 0.981 | 0.983 | 0.964 | 0.979 | 0.920 | 0.982 |
| Linear Discriminant Analysis    | 1.000 | 1.000 | 1.000 | 1.000 | 1.000 | 0.929 | 0.972 | 0.933 | 0.921 | 0.941 | 0.981 | 0.976 | 0.967 | 0.941 | 0.960 | 0.958 | 0.927 | 0.946 | 0.978 | 0.931 | 0.918 | 1.000 | 0.958 | 0.981 | 0.983 | 0.964 | 0.979 | 0.920 | 0.982 |       |
| Logistic Regression             | 1.000 | 1.000 | 1.000 | 1.000 | 1.000 | 0.929 | 0.972 | 0.933 | 0.921 | 0.941 | 0.981 | 0.976 | 0.967 | 0.941 | 0.960 | 0.958 | 0.927 | 0.946 | 0.978 | 0.931 | 0.918 | 1.000 | 0.958 | 0.981 | 0.983 | 0.964 | 0.979 | 0.920 | 0.982 |       |
| Multi Layer Perceptron          | 1.000 | 1.000 | 1.000 | 1.000 | 1.000 | 0.929 | 0.972 | 0.933 | 0.921 | 0.941 | 0.981 | 0.976 | 0.967 | 0.941 | 0.960 | 0.958 | 0.927 | 0.946 | 0.978 | 0.931 | 0.918 | 1.000 | 0.958 | 0.981 | 0.983 | 0.964 | 0.979 | 0.920 | 0.982 |       |
| Nearest Centroid                | 0.960 | 0.941 | 0.865 | 0.923 | 0.955 | 1.000 | 0.917 | 0.933 | 0.942 | 0.916 | 0.941 | 0.950 | 0.952 | 0.933 | 0.938 | 0.782 | 0.938 | 0.927 | 0.946 | 0.978 | 0.931 | 0.893 | 1.000 | 0.958 | 0.981 | 0.983 | 0.964 | 0.979 | 0.920 | 0.982 |
| Nearest Neighbors               | 1.000 | 1.000 | 1.000 | 1.000 | 1.000 | 0.964 | 0.972 | 0.987 | 0.971 | 0.986 | 1.000 | 1.000 | 1.000 | 1.000 | 1.000 | 0.975 | 0.975 | 0.975 | 0.975 | 0.975 | 0.975 | 0.975 | 0.975 | 0.975 | 0.975 | 0.975 | 0.975 | 0.975 | 0.975 | 0.975 |
| Passive Aggressive Classifier   | 1.000 | 1.000 | 1.000 | 1.000 | 1.000 | 0.981 | 0.987 | 0.981 | 0.987 | 0.981 | 0.987 | 0.981 | 0.987 | 0.981 | 0.987 | 0.981 | 0.987 | 0.981 | 0.987 | 0.981 | 0.987 | 0.981 | 0.987 | 0.981 | 0.987 | 0.981 | 0.987 | 0.981 | 0.987 | 0.981 |
| Passive Aggressive Classifier   | 1.000 | 1.000 | 1.000 | 1.000 | 1.000 | 0.981 | 0.987 | 0.981 | 0.987 | 0.981 | 0.987 | 0.981 | 0.987 | 0.981 | 0.987 | 0.981 | 0.987 | 0.981 | 0.987 | 0.981 | 0.987 | 0.981 | 0.987 | 0.981 | 0.987 | 0.981 | 0.987 | 0.981 | 0.987 | 0.981 |
| Quadratic Discriminant Analysis | 0.917 | 1.000 | 1.000 | 1.000 | 1.000 | 0.944 | 0.918 | 0.967 | 0.969 | 1.000 | 0.944 | 0.929 | 0.940 | 0.944 | 0.929 | 0.940 | 0.929 | 0.940 | 0.944 | 0.929 | 0.940 | 0.944 | 0.929 | 0.940 | 0.944 | 0.929 | 0.940 | 0.944 | 0.929 | 0.982 |
| Random Forest                   | 1.000 | 1.000 | 1.000 | 1.000 | 1.000 | 0.974 | 1.000 | 0.974 | 1.000 | 1.000 | 0.974 | 1.000 | 0.974 | 1.000 | 0.974 | 1.000 | 0.974 | 1.000 | 0.974 | 1.000 | 0.974 | 1.000 | 0.974 | 1.000 | 0.974 | 1.000 | 0.974 | 1.000 | 0.974 | 1.000 |
| SVM - linear                    | 1.000 | 1.000 | 1.000 | 1.000 | 1.000 | 0.964 | 1.000 | 0.967 | 0.981 | 1.000 | 0.971 | 1.000 | 1.000 | 1.000 | 0.962 | 0.946 | 0.958 | 0.927 | 0.946 | 1.000 | 0.931 | 0.893 | 1.000 | 0.981 | 0.983 | 1.000 | 0.983 | 1.000 | 0.984 | 0.982 |
| SVM - poly                      | 1.000 | 1.000 | 1.000 | 1.000 | 1.000 | 0.964 | 1.000 | 0.967 | 0.981 | 1.000 | 0.971 | 1.000 | 1.000 | 1.000 | 0.962 | 0.946 | 0.958 | 0.927 | 0.946 | 1.000 | 0.931 | 0.893 | 1.000 | 0.981 | 0.983 | 1.000 | 0.983 | 1.000 | 0.984 | 0.982 |
| SVM - rbf                       | 1.000 | 1.000 | 1.000 | 1.000 | 1.000 | 0.974 | 1.000 | 0.967 | 0.981 | 1.000 | 0.971 | 1.000 | 1.000 | 1.000 | 0.962 | 0.946 | 0.958 | 0.927 | 0.946 | 1.000 | 0.931 | 0.893 | 1.000 | 0.981 | 0.983 | 1.000 | 0.983 | 1.000 | 0.984 | 0.982 |

Table 4.42 | Balanced accuracy score for 30 homogeneity image feature datasets for cell line U251

| Classifiers                     | P1    | P2    | P3    | P4    | P5    | P6    | P7    | P8    | P9    | P10   | P11   | P12   | P13   | P14   | P15   | P16   | P17   | P18   | P19   | P20   | P21   | P22   | P23   | P24   | P25   | P26   | P27   | P28   | P29   | P30   |
|---------------------------------|-------|-------|-------|-------|-------|-------|-------|-------|-------|-------|-------|-------|-------|-------|-------|-------|-------|-------|-------|-------|-------|-------|-------|-------|-------|-------|-------|-------|-------|-------|
| AdaBoost                        | 1.000 | 1.000 | 1.000 | 1.000 | 1.000 | 0.974 | 1.000 | 0.974 | 1.000 | 1.000 | 0.975 | 1.000 | 0.952 | 0.955 | 0.982 | 0.922 | 0.946 | 0.978 | 0.931 | 0.974 | 1.000 | 0.931 | 0.947 | 1.000 | 0.983 | 1.000 | 0.983 | 1.000 | 0.984 | 0.982 |
| Bernoulli Naive Bayes           | 1.000 | 1.000 | 1.000 | 1.000 | 1.000 | 0.978 | 0.974 | 1.000 | 0.975 | 0.983 | 1.000 | 0.975 | 0.983 | 1.000 | 0.962 | 0.946 | 0.917 | 0.969 | 0.972 | 1.000 | 0.926 | 0.974 | 1.000 | 0.980 | 0.962 | 0.983 | 0.946 | 0.681 | 0.960 | 0.982 |
| Decision Tree                   | 1.000 | 1.000 | 1.000 | 1.000 | 1.000 | 1.000 | 1.000 | 1.000 | 1.000 | 1.000 | 1.000 | 1.000 | 1.000 | 1.000 | 1.000 | 1.000 | 1.000 | 1.000 | 1.000 | 1.000 | 1.000 | 1.000 | 1.000 | 1.000 | 1.000 | 1.000 | 1.000 | 1.000 | 1.000 | 1.000 |
| Extra Trees                     | 1.000 | 1.000 | 1.000 | 1.000 | 1.000 | 0.974 | 1.000 | 0.974 | 1.000 | 1.000 | 0.974 | 1.000 | 0.974 | 1.000 | 0.974 | 1.000 | 0.974 | 1.000 | 0.974 | 1.000 | 0.974 | 1.000 | 0.974 | 1.000 | 0.974 | 1.000 | 0.974 | 1.000 | 0.974 | 1.000 |
| Gaussian Naive Bayes            | 1.000 | 1.000 | 1.000 | 1.000 | 1.000 | 0.987 | 1.000 | 0.987 | 1.000 | 0.987 | 1.000 | 0.987 | 1.000 | 0.987 | 1.000 | 0.987 | 1.000 | 0.987 | 1.000 | 0.987 | 1.000 | 0.987 | 1.000 | 0.987 | 1.000 | 0.987 | 1.000 | 0.987 | 1.000 | 0.987 |
| Gradient Boosting               | 1.000 | 1.000 | 1.000 | 1.000 | 1.000 | 0.987 | 1.000 | 0.987 | 1.000 | 0.987 | 1.000 | 0.987 | 1.000 | 0.987 | 1.000 | 0.987 | 1.000 | 0.987 | 1.000 | 0.987 | 1.000 | 0.987 | 1.000 | 0.987 | 1.000 | 0.987 | 1.000 | 0.987 | 1.000 | 0.987 |
| Helstrom Quantum Classifier     | 1.000 | 1.000 | 1.000 | 1.000 | 1.000 | 0.974 | 1.000 | 0.974 | 1.000 | 1.000 | 0.974 | 1.000 | 0.974 | 1.000 | 0.974 | 1.000 | 0.974 | 1.000 | 0.974 | 1.000 | 0.974 | 1.000 | 0.974 | 1.000 | 0.974 | 1.000 | 0.974 | 1.000 | 0.974 | 1.000 |
| Linear Discriminant Analysis    | 1.000 | 1.000 | 1.000 | 1.000 | 1.000 | 0.967 | 1.000 | 0.974 | 1.000 | 1.000 | 0.967 | 1.000 | 1.000 | 1.000 | 0.962 | 0.946 | 0.917 | 0.927 | 0.972 | 1.000 | 0.931 | 0.893 | 1.000 | 0.980 | 0.983 | 1.000 | 0.983 | 1.000 | 0.984 | 0.982 |
| Logistic Regression             | 1.000 | 1.000 | 1.000 | 1.000 | 1.000 | 0.967 | 1.000 | 0.974 | 1.000 | 1.000 | 0.967 | 1.000 | 1.000 | 1.000 | 0.962 | 0.946 | 0.917 | 0.927 | 0.972 | 1.000 | 0.931 | 0.893 | 1.000 | 0.980 | 0.983 | 1.000 | 0.983 | 1.000 | 0.984 | 0.982 |
| Multi Layer Perceptron          | 1.000 | 1.000 | 1.000 | 1.000 | 1.000 | 0.967 | 1.000 | 0.974 | 1.000 | 1.000 | 0.967 | 1.000 | 1.000 | 1.000 | 0.962 | 0.946 | 0.917 | 0.927 | 0.972 | 1.000 | 0.931 | 0.893 | 1.000 | 0.980 | 0.983 | 1.000 | 0.983 | 1.000 | 0.984 | 0.982 |
| Nearest Centroid                | 1.000 | 1.000 | 1.000 | 1.000 | 1.000 | 0.974 | 1.000 | 0.967 | 0.981 | 1.000 | 0.971 | 1.000 | 1.000 | 1.000 | 0.962 | 0.946 | 0.917 | 0.927 | 0.972 | 1.000 | 0.931 | 0.893 | 1.000 | 0.981 | 0.983 | 1.000 | 0.983 | 1.000 | 0.984 | 0.982 |
| Nearest Neighbors               | 1.000 | 1.000 | 1.000 | 1.000 | 1.000 | 0.974 | 1.000 | 0.967 | 0.981 | 1.000 | 0.971 | 1.000 | 1.000 | 1.000 | 0.962 | 0.946 | 0.917 | 0.927 | 0.972 | 1.000 | 0.931 | 0.893 | 1.000 | 0.981 | 0.983 | 1.000 | 0.983 | 1.000 | 0.984 | 0.982 |
| Passive Aggressive Classifier   | 1.000 | 1.000 | 1.000 | 1.000 | 1.000 | 0.967 | 1.000 | 0.974 | 1.000 | 1.000 | 0.967 | 1.000 | 1.000 | 1.000 | 0.962 | 0.946 | 0.917 | 0.927 | 0.972 | 1.000 | 0.931 | 0.893 | 1.000 | 0.981 | 0.983 | 1.000 | 0.983 | 1.000 | 0.984 | 0.982 |
| Passive Aggressive Classifier   | 1.000 | 1.000 | 1.000 | 1.000 | 1.000 | 0.967 | 1.000 | 0.974 | 1.000 | 1.000 | 0.967 | 1.000 | 1.000 | 1.000 | 0.962 | 0.946 | 0.917 | 0.927 | 0.972 | 1.000 | 0.931 | 0.893 | 1.000 | 0.981 | 0.983 | 1.000 | 0.983 | 1.000 | 0.984 | 0.982 |
| Quadratic Discriminant Analysis | 0.917 | 1.000 | 1.000 | 1.000 | 1.000 | 0.944 | 0.918 | 0.967 | 0.969 | 1.000 | 0.944 | 0.929 | 0.940 | 0.944 | 0.929 | 0.940 | 0.929 | 0.940 | 0.944 | 0.929 | 0.940 | 0.944 | 0.929 | 0.940 | 0.944 | 0.929 | 0.940 | 0.944 | 0.929 | 0.982 |
| Random Forest                   | 1.000 | 1.000 | 1.000 | 1.000 | 1.000 | 0.974 | 1.000 | 0.974 | 1.000 | 1.000 | 0.974 | 1.000 | 0.974 | 1.000 | 0.974 | 1.000 | 0.974 | 1.000 | 0.974 | 1.000 | 0.974 | 1.000 | 0.974 | 1.000 | 0.974 | 1.000 | 0.974 | 1.000 | 0.974 | 1.000 |
| SVM - linear                    | 1.000 | 1.000 | 1.000 | 1.000 | 1.000 | 0.964 | 1.000 | 0.967 | 0.981 | 1.000 | 0.971 | 1.000 | 1.000 | 1.000 | 0.962 | 0.946 | 0.917 | 0.927 | 0.972 | 1.000 | 0.931 | 0.893 | 1.000 | 0.981 | 0.983 | 1.000 | 0.983 | 1.000 | 0.984 | 0.982 |
| SVM - poly                      | 1.000 | 1.000 | 1.000 | 1.000 | 1.000 | 0.964 | 1.000 | 0.967 | 0.981 | 1.000 | 0.971 | 1.000 | 1.000 | 1.000 | 0.962 | 0.946 | 0.917 | 0.927 | 0.972 | 1.000 | 0.931 | 0.893 | 1.000 | 0.981 | 0.983 | 1.000 | 0.983 | 1.000 | 0.984 | 0.982 |
| SVM - rbf                       | 1.000 | 1.    |       |       |       |       |       |       |       |       |       |       |       |       |       |       |       |       |       |       |       |       |       |       |       |       |       |       |       |       |



## References

1. Haralick, R. M., Shanmugam, K. *et al.* Textural features for image classification. *IEEE Trans. Syst. Man Cybern.* **SMC-3**, 610–621, DOI: [10.1109/TSMC.1973.4309314](https://doi.org/10.1109/TSMC.1973.4309314) (1973).
2. Haralick, R. M. Statistical and structural approaches to texture. *Proc. IEEE* **67**, 786–804, DOI: [10.1109/PROC.1979.11328](https://doi.org/10.1109/PROC.1979.11328) (1979).
3. Rundo, L. *et al.* HaraliCU: GPU-powered Haralick feature extraction on medical images exploiting the full dynamics of gray-scale levels. In Malyshkin, V. (ed.) *Parallel Computing Technologies (PaCT)*, vol. 11657 of *LNCS*, 304–318, DOI: [978-3-030-25636-4\\_24](https://doi.org/10.1007/978-3-030-25636-4_24) (Springer International Publishing, Cham, Switzerland, 2019).
